1 **The proteasome acts as a hub for local and systemic plant immunity in**  
2 ***Arabidopsis thaliana* and constitutes a virulence target of *Pseudomonas***  
3 ***syringae* type-III effector proteins**

4

5 Suayib Üstün<sup>1a</sup>, Arsheed Sheikh<sup>3b</sup>, Selena Gimenez-Ibanez<sup>3,4b</sup>, Alexandra Jones<sup>3</sup>, Vardis Ntoukakis<sup>3a</sup>  
6 and Frederik Börnke<sup>1,2a</sup>

7

8 <sup>1</sup> Plant Metabolism Group, Leibniz-Institute of Vegetable and Ornamental Crops (IGZ), Theodor-Echtermeyer-Weg 1, 14979  
9 Großbeeren

10 <sup>2</sup> Institut of Biochemistry and Biology, University of Potsdam, Karl-Liebknecht-Str. 24-25, Haus 29, 14476 Potsdam

11 <sup>3</sup> School of Life Sciences, University of Warwick, Coventry CV4 7AL, UK

12 <sup>4</sup> Plant Molecular Genetics Department, Centro Nacional de Biotecnología-CSIC (CNB-CSIC), 28049 Madrid, Spain.

13 <sup>a</sup> Corresponding author

14 <sup>b</sup> These authors contributed equally to this work

15

16 **One sentence summary:**

17 The proteasome is required for local and systemic immune responses and is targeted by  
18 *Pseudomonas* type-III effectors

19 **Footnotes**

20 SÜ, VN and FB designed the experiments. SÜ, AS, SG and AJ performed the experiments. SÜ, FB,  
21 AS, SG, AJ and VN analysed the data. SG contributed novel experimental material. SÜ wrote the  
22 paper with contributions of all authors.

23

24 Corresponding authors: Suayib Üstün, Vardis Ntoukakis and Frederik Börnke

25 Email: [uestuen@igzev.de](mailto:uestuen@igzev.de), [V.Ntoukakis@warwick.ac.uk](mailto:V.Ntoukakis@warwick.ac.uk) or [boernke@igzev.de](mailto:boernke@igzev.de)

## 26 **Abstract**

27 Recent evidence suggests that the ubiquitin-proteasome system (UPS) is involved in several aspects  
28 of plant immunity and a range of plant pathogens subvert the UPS to enhance their virulence. Here,  
29 we show that proteasome activity is strongly induced during basal defense in Arabidopsis and mutant  
30 lines defective in proteasome subunits *RPT2a* and *RPN12a* support increased bacterial growth of  
31 virulent *Pseudomonas syringae* DC3000 (*Pst*), strains in local leaves. Both proteasome subunits are  
32 required for PTI events such as production of reactive oxygen species and mitogen-activated protein  
33 kinases signaling as well as for defense gene expression. Furthermore, analysis of bacterial growth  
34 after a secondary infection of systemic leaves revealed that the establishment of systemic-acquired  
35 resistance (SAR) is impaired in proteasome mutants, suggesting that the proteasome plays an  
36 important role in defense priming and SAR. In addition, we show that *Pst* inhibits proteasome activity  
37 in a type-III secretion dependent manner. A systematic screen for type-III effector proteins from *Pst*  
38 for their ability to interfere with proteasome activity revealed HopM1, HopAO1, HopA1 and HopG1 as  
39 candidates. Identification of proteins interacting with HopM1 by mass-spectrometry indicate that  
40 HopM1 resides in a complex together with several E3 ubiquitin ligases and proteasome subunits,  
41 supporting the hypothesis that HopM1 associates with the proteasome leading to its inhibition. We  
42 conclude that the proteasome is an essential component of the plant immune system and that some  
43 pathogens have developed a general strategy to overcome proteasome-mediated defense.

44

45

## 46 **Introduction**

47

48 The ubiquitin-proteasome system (UPS) is one of the main protein degradation systems of eukaryotic  
49 cells that not only removes misfolded and defective proteins but also controls various cellular  
50 pathways through the selective elimination of short-lived regulatory proteins (Vierstra, 2009). The UPS  
51 regulates many fundamental cellular processes, such as protein quality control, DNA repair and signal  
52 transduction (Sadanandom et al., 2012). Selective protein degradation by the UPS proceeds from the  
53 ligation of one or more ubiquitin proteins to the  $\epsilon$ -amino group of a lysine residue within specific target  
54 proteins catalysed by the consecutive action of E1, E2, and E3 enzymes. The resulting ubiquitinated  
55 proteins are then recognized and degraded by the 26S proteasome. The 26S proteasome itself is a  
56 2.5 MDa ATP-dependent protease complex composed of 31 subunits divided into two types of  
57 subcomplexes, namely the 20S core protease (CP) and the 19S regulatory particles (RPs). While the  
58 CP is a broad spectrum ATP- and ubiquitin-independent protease complex, the RP subcomplex  
59 assists in recognizing ubiquitinated target proteins and in opening the channel of the CP to insert the  
60 unfolded substrates into the CP chamber for degradation (Smalle and Vierstra, 2004). During the past  
61 few years, several studies have revealed that the UPS controls various processes in almost all  
62 aspects of plant homeostasis, comprising cell division, plant development, responses to plant  
63 hormones as well as abiotic and biotic stress responses (Sadanandom et al., 2012).

64 It is becoming increasingly obvious that the regulated protein turnover via UPS controls multiple  
65 aspects of plant immunity, including pathogen recognition, immune receptor accumulation, and  
66 downstream defence signalling (Marino et al., 2012). Plant immunity relies on a multi-layered system  
67 to detect and resist attempted pathogen invasion. Cell surface immune receptors recognize conserved

68 pathogen-associated molecular patterns (PAMPs) and initiate basal defences, known as PAMP-  
69 triggered immunity (PTI) (Jones and Dangl, 2006). This recognition results in the initiation of  
70 intracellular down-stream signalling that leads to the production of reactive oxygen species (ROS),  
71 activation of mitogen-activated protein kinase (MAPK) cascades, transcriptional reprogramming,  
72 expression of pathogen-related (PR) proteins and callose deposition at the cell wall (Boller and Felix,  
73 2009). Adapted plant pathogens are able to overcome PTI by delivering effector proteins into host  
74 cells and induce effector-triggered susceptibility (ETS). On the other hand, resistant plants have  
75 evolved the ability to monitor the presence or activities of effectors by intracellular immune receptors,  
76 commonly referred to as “resistance (R) proteins”, resulting in effector-triggered immunity (ETI) (Jones  
77 and Dangl, 2006). ETI is often accompanied by the hypersensitive response (HR), a form of localized  
78 programmed cell death (PCD) at the primary infection site (Hofius et al., 2007), thereby restricting the  
79 pathogen spread within infected tissue.

80 Localised pathogen attack can also lead to increased resistance towards secondary infection in  
81 uninfected parts of the plants. This type of increased resistance is referred to as systemic acquired  
82 resistance (SAR) (Fu and Dong, 2013). After SAR has been induced, plants are primed (i.e.  
83 sensitized) to respond more rapidly and more effectively to a secondary infection. Long distance  
84 signalling between the primary infected leaf and distal leaves is required for the onset of SAR. The  
85 defence hormone salicylic acid (SA) is known to be critical for the establishment of SAR in remote  
86 tissue as it is supposed to induce SAR-related gene expression via the downstream regulator NON-  
87 EXPRESSER OF PR GENES1 (NPR1), a transcriptional co-activator (Fu and Dong, 2013). However,  
88 other signalling metabolites such as pipecolic acid (Navarova et al., 2012) have also been shown to  
89 play an essential role in the establishment of SAR and pipecolic acid signalling appears to presuppose  
90 effective SA-signalling (Bernsdorff et al., 2016).

91 The intricate molecular processes underlying the cellular changes during PTI, ETI and SAR require a  
92 high degree of proteomic plasticity, likely involving the UPS at various levels. For instance, recent  
93 studies identified that members of the U-box E3 ligase family are negative regulators of PTI (Trujillo et  
94 al., 2008; Stegmann et al., 2012). In addition, some key plant defence signalling components are  
95 degraded by the 26S proteasome pathway, including the PAMP receptor FLS2 (Lu et al., 2011), the  
96 master regulator of SA-dependent defence NPR1 (Spoel et al., 2009), and WRKY45 from rice. The  
97 latter is a BTH -inducible transcription factor conferring strong resistance to fungal blast (Matsushita et  
98 al., 2012). Apart from its function in regulating the turnover of components implicated in plant  
99 immunity, several proteasome components have been identified to directly contribute to defence  
100 responses such as ROS production and HR formation (Marino et al., 2012). In particular, PBA1, the  
101 catalytic subunit of the 20S has been proposed to act as a caspase-like enzyme during the induction  
102 of programmed cell death in response to avirulent bacterial strains (Hatsugai et al., 2009).  
103 Concomitant with the role of 20S subunits in plant immunity, RPN1a, a component of the RP, has  
104 been described to be required for resistance in *Arabidopsis* against biotrophic fungi (Yao et al., 2012).  
105 The latter study also showed that accumulation of RPN1a is affected by SA and that the *rpn1a* mutant  
106 has defects in SA accumulation upon infection with *Pst*. However, based on the analysis of additional  
107 mutants it appears that not all proteasome subunits play a similar role in immunity (Yao et al., 2012).

108 Considering the role of the UPS in plant defence responses, co-evolution between pathogens and  
109 their respective host plants has selected for virulence factors that can manipulate the UPS by targeting  
110 or exploiting certain UPS components to enhance virulence during plant-pathogen interactions  
111 (Dudler, 2013). Gram-negative bacterial pathogens use a type III secretion system to inject so called  
112 type III effector (T3E) proteins into host cells to interfere with host cellular functions and immunity  
113 (Macho, 2016). Several T3Es from different genera of plant pathogenic bacteria such as  
114 *Pseudomonas* or *Xanthomonas* were shown to suppress plant defences by acting as E3 ligases (e.g.  
115 AvrPtoB, XopL), or by promoting ubiquitination and degradation of target proteins (e.g. HopM1)  
116 (Nomura et al., 2006; Singer et al., 2013; Üstün and Börnke, 2014; Banfield, 2015; Üstün and Börnke,  
117 2015). A more direct way to subvert the UPS is achieved by SylA, a secreted small non-ribosomal  
118 peptide from *P. syringae* pv. *syringae*, which binds to the catalytic subunits of the 26S proteasome to  
119 inhibit its activity and suppress plant immune reactions, including stomatal closure and salicylic acid  
120 (SA)-mediated signalling (Groll et al., 2008; Schellenberg et al., 2010; Misas-Villamil et al., 2013). The  
121 first bacterial T3Es that directly target the proteasome for defence suppression are XopJ from  
122 *Xanthomonas campestris* pv. *vesicatoria* and HopZ4 from *Pseudomonas syringae*. Both closely  
123 related T3Es interact with the proteasomal component RPT6, a subunit of the 19S RP, to inhibit  
124 proteasome activity (Üstün et al., 2013; Üstün et al., 2014; Üstün and Börnke, 2015). In effect, this  
125 results in impaired turnover of the SA master regulator NPR1 and the attenuation of SA-dependent  
126 defence responses.

127 Despite the significance advances in the recent years, we still lack knowledge of how the proteasome  
128 is involved in defence responses and whether targeting the host proteasome is a general strategy of  
129 various plant pathogens to establish disease. In order to gather more information on this aspect of  
130 plant-bacteria interactions, we systematically analysed the contribution of the proteasome to plant  
131 immunity, in particular during local and systemic defence responses of *Arabidopsis thaliana* towards  
132 virulent *Pseudomonas syringae* DC3000 (*Pst*) bacteria. Furthermore, the ability of *Pst* to modulate  
133 proteasome function through the delivery of T3Es was investigated. Our results show that proteasome  
134 subunits RPT2a and RPN12a are required for PTI events and the establishment of SAR, being  
135 essential for resistance against pathogenic and non-pathogenic bacteria. In turn, we could reveal by a  
136 systematic screen of the T3E repertoire of *Pst* that this pathogen evolved T3Es to interfere with  
137 proteasome function. In particular, we could identify T3Es HopM1, HopAO1, HopA1 and HopG1 as  
138 candidates suppressing proteasome activity. Further biochemical analysis revealed that HopM1  
139 interacts with multiple proteins including UPS related proteins. Based on the data presented, we  
140 conclude that the proteasome is an essential component of the plant immune system and pathogens  
141 developed the ability to overcome proteasome-mediated defence as a general virulence strategy.

142

## 143 **Results**

144

### 145 **The proteasome is required during PTI and suppressed in a T3E-dependent manner**

146 In order to investigate whether proteasome activity is modulated during induced defence in local  
147 leaves of the model plant *Arabidopsis thaliana* infected with *Pst*, proteasome activity was assessed in  
148 leaves of wild type *Arabidopsis* plants inoculated either with a *Pst* wild type strain or a *Pst* $\Delta$ *hrcC* strain,  
149 which is not able to deliver T3Es into the host cell. The measurements revealed that proteasome

150 activity is significantly induced in *Pst*  $\Delta hrcC$  infected leaves when compared to the mock control (Fig.  
151 1A), while infection with *Pst* wild type bacteria leads to a significant reduction in activity. This indicates  
152 that proteasome activity is induced during basal defence in response to infection with the non-  
153 pathogenic bacterium *Pst*  $\Delta hrcC$  and that virulent *Pst* can suppress this induction in a T3E –  
154 dependent manner. A western blot analysis using an antibody directed against ubiquitin on extracts  
155 from *Pst* wild type and *Pst*  $\Delta hrcC$  infected leaves revealed the accumulation of ubiquitinated proteins  
156 in both the cases (Fig. 1B, upper panel). However, when probed with an antibody directed against the  
157 proteasome core subunit PBA1, only *Pst* wild type infected leaves showed accumulation of  
158 unprocessed PBA1 (Figure 1B, lower panel) indicating disturbed proteasome maturation (Book et al.,  
159 2010). These findings suggest that proteasome activity is induced as part of the defence response to  
160 non-pathogenic bacteria and also constitutes a virulence target for *Pst* during the compatible infection  
161 of *Arabidopsis*.

162

### 163 **Suppression of proteasome activity by *Pst* is independent of PTI inhibition and a functional SA** 164 **signalling pathway**

165 To rule out that the T3E-dependent suppression of early PTI during *Pst*-*Arabidopsis* interaction  
166 compromises proteasome function, we assessed whether the inhibition of the proteasome is linked to  
167 PTI suppression by T3Es. To this end, we infected plants with a *Pst*  $\Delta avrPto/avrPtoB$  deletion strain  
168 that is compromised in suppression of early immune responses (He et al., 2006; Kvitko et al., 2009;  
169 Cunnac et al., 2011). In the absence of both T3Es *Pst* showed a similar degree of proteasome  
170 inhibition than the wild type (Fig. 2A), excluding the possibility that inhibition of early events of PTI is  
171 responsible for the effect on proteasome function and ruling out that neither AvrPto nor AvrPtoB are  
172 required for proteasome suppression.

173 Previous results demonstrated that the proteasome is activated by SA treatment and plants impaired  
174 in SA signalling are unable to induce proteasome activity upon infection (Gu et al., 2010; Üstün et al.,  
175 2013). In the light of these observations, we investigated whether the inhibitory effect of *Pst* on the  
176 proteasome is due to its ability to dampen SA signalling (DebRoy et al., 2004). To this end, we  
177 performed *Pst* infection assays with *npr1-1* mutant lines that lack a functional SA signalling (Cao et al.,  
178 1997). Consistent with previous experiments using wild type plants, *Pst*  $\Delta hrcC$  was not able to induce  
179 proteasome activity in *npr1-1* (Fig. 2B), supporting the notion that proteasome activity seems to be at  
180 least partially induced by NPR1 – dependent SA-signalling during defence. However, *Pst* wild-type  
181 was still able to further inactivate the proteasome below levels detected in the mock control (Fig. 2B),  
182 demonstrating that *Pst* disables proteasome function independently of its ability to suppress SA  
183 signalling. This suggests that *Pst* directly inhibits proteasome activity, presumably by T3Es.

184

### 185 **Proteasome mutants are more susceptible to pathogenic and non-pathogenic *Pseudomonas*** 186 **strains**

187 In order to obtain genetic evidence for an involvement of the proteasome in basal defence responses  
188 a set of *Arabidopsis* mutant lines carrying defects in different proteasomal subunits was used for  
189 infection experiments with pathogenic bacteria. RPT2a is a subunit of the 19S RP of the proteasome  
190 where it gates the axial channel of the 20S core particle and controls substrate entry and product

191 release. The *Arabidopsis rpt2a-2* mutant is a T-DNA insertion with only 25% of the RPT2 protein  
192 amount as compared to the wild type, which is due to the expression of the second RPT2 isoform  
193 encoded by the *RPT2b* gene (Lee et al., 2011). The *rpt2a-2* plants are affected in root elongation,  
194 leaf/organ size, trichome branching, endoreduplication, inflorescence stem fasciation, and flowering  
195 time (Lee et al., 2011). RPN12a is also part of the 19S RP where it is involved in complex assembly  
196 and the *Arabidopsis rpn12a-1* mutant was originally created by exon-trap mutagenesis and expresses  
197 an RPN12a-NPTII fusion protein whose incorporation into the 26S proteasome complex was proposed  
198 to have subtle effects on proteasome function (Smalle, 2002). The *rpn12a-1* mutant shows decreased  
199 rates of leaf formation, reduced root elongation, delayed skotomorphogenesis, and altered growth  
200 responses to exogenous cytokinins, suggesting that the mutant has decreased hormone sensitivity  
201 (Smalle et al., 2002). We first tested the susceptibility of both mutant genotypes towards virulent  
202 *Pseudomonas syringae* pv *maculicola* ES4326 (*Psm*) and monitored bacterial multiplication and  
203 symptom development 2 days post infection. As shown in Fig. 3A, *rpt2a-2* and *rpn12a-1* plants  
204 supported bacterial growth to significantly higher levels than the wild type and also showed  
205 accelerated symptom development on infected leaves (Fig. 3B). Thus, these data indicate that a fully  
206 functional proteasome is required to mount an efficient local defence response against virulent *Psm*.  
207 Infecting plants with the *Pst* strain also resulted in an enhanced bacterial proliferation in the  
208 proteasome mutants (Fig. 3C), which was also reflected by the stronger development of disease  
209 symptoms, such as leaf yellowing (Fig. 3D). Prompted by the finding that proteasome activity is highly  
210 induced upon *Pst* $\Delta$ *hrcC* infection, we next tested whether the proteasome mutant lines also show a  
211 higher sensitivity towards this strain. Measurement of bacterial growth revealed that the proteasome  
212 mutants supported more bacterial growth of the non-pathogenic *Pst* $\Delta$ *hrcC* (Fig. 3E). Thus the  
213 proteasome seems to play a critical role during PTI and is implicated in early immune responses.

#### 214 215 **The proteasome is required for PAMP-triggered immunity**

216 Because the proteasome is involved in local defence responses towards pathogenic and non-  
217 pathogenic bacteria, we further analysed the role of the proteasome during certain PTI responses. To  
218 this end, we first determined the production of reactive oxygen species. Recognition of flg22 by the  
219 PRR FLS2 (Gomez-Gomez and Boller, 2000) leads to an oxidative burst, one of the first measurable  
220 responses of plants to PAMP perception (Nicaise et al., 2009). ROS production in *rpt2a-2* and *rpn12a-1*  
221 plants was significantly attenuated compared to the Col-0 wild-type plants upon flg22 treatment  
222 (Fig.4A), indicating that early PTI responses such as ROS generation are partially dependent on a  
223 functional proteasomal turnover. In accordance with the decreased oxidative burst, the transcriptional  
224 response of *RbohD*, encoding an NADPH oxidase that is essential for flg22-triggered ROS production,  
225 was dampened in the proteasome mutant lines compared to Col-0 plants (Fig. 4B). Further  
226 downstream signalling cascades activated by the perception of PAMPs comprise the phosphorylation  
227 of MAPKs leading to the activation of MPK3, 6 and 4/11. Thus, we analysed whether this signalling  
228 cascade is altered in the proteasome mutants. Immunoblot analysis using an antibody against  
229 activated MAPKs revealed that in comparison to Col-0 plants, both proteasome mutants exhibited  
230 impaired kinetics of MAPK activation, as the phosphorylation signal was more rapidly fading out in the  
231 *rpt2a-2* and *rpn12a-1* mutants (Fig. 4C).

232 In order to assess whether PTI is perturbed at the transcriptional level, we investigated the expression  
233 of PTI marker genes in *rpt2a-2* and *rpn12a-1* mutant plants and determined the gene expression of  
234 *WRKY11* and *WRKY29* upon flg22 stimulus (Stegmann et al., 2012). Real-time PCR revealed that the  
235 transcriptional activation of both PTI marker genes was significantly diminished in the proteasome  
236 mutant lines (Fig. 4D, E), providing further indications for a compromised PTI response in the  
237 proteasome mutants. Moreover, activation of *PR1* expression, a marker gene for the salicylic acid  
238 pathway, was also reduced in the proteasome mutants as compared to the control (Fig. 4F). Taken  
239 together, these data indicates that a fully functional proteasome is required during early and late PTI  
240 responses.

241

#### 242 **Role of the proteasome in defence priming during SAR**

243 Due to the fact that the expression of SA-inducible *PR1* was altered in the proteasome mutant lines  
244 (Fig.4F) and its prominent role during SAR, we investigated the role of the proteasome in defence  
245 priming during SAR. *Arabidopsis* proteasome mutants *rpt2a-2* and *rpn12a-1* were infected in lower  
246 (1°) leaves with the SAR-inducing pathogen *Psm* (Navarova et al., 2012). Analysis of bacterial growth  
247 after a secondary infection of systemic leaves (2°) two days after the primary infection revealed that  
248 bacterial multiplication was significantly inhibited in systemic leaves of wild type Col-0 plants,  
249 indicating that the primary infection with *Psm* induced effective SAR and primed the plants for a  
250 secondary infection of systemic leaves (Fig. 5A). In contrast, there was no significant difference in  
251 bacterial growth in systemic leaves of the proteasome mutants as compared to the unprimed mock  
252 control. Thus, the establishment of SAR is impaired in proteasome mutants as compared to Col-0  
253 plants. This suggests that the proteasome plays an important role not only during local defence  
254 responses, but also in the establishment of systemic defence priming and SAR.

255 To further corroborate this finding on the molecular level, SAR marker gene expression was analysed  
256 in systemic (2°) leaves of plants primed with *Psm* infection in local (1°) leaves. FLAVIN-DEPENDENT  
257 MONO-OXYGENASE1 (*FMO1*) is critical component of SAR establishment required for SA  
258 accumulation in systemic, noninoculated leaves (Mishina and Zeier, 2006) while AGD2-LIKE  
259 DEFENSE RESPONSEPROTEIN1 (*ALD1*) represents the aminotransferase required for the  
260 biosynthesis of the SAR signalling metabolite pipecolic acid (Navarova et al., 2012). As shown in  
261 Figure 5B, both *FMO1* and *ALD1* mRNA levels were strongly induced in 2° leaves of wild type  
262 *Arabidopsis* plants primed with *Psm* infection in 1° leaves as compared to the unprimed control,  
263 indicating that these plants effectively established SAR. On the contrary, *rpt2a-2* and *rpn12a-1* plants  
264 displayed no induction of *FMO1* or *ALD1* expression in challenge infected 2° leaves irrespective of the  
265 type of treatment of the 1° leaf. Thus, *rpt2a-2* and *rpn12a-1* plants lack induction of the essential SAR  
266 components *FMO1* and *ALD1* in systemic tissue upon a priming infection with *Psm* in 1° leaves. In  
267 order to analyses whether gene expression changes downstream of *FMO1* and *ALD1* are also  
268 impaired in *rpt2a-2* and *rpn12a-1* mutant plants, we determined the expression of the SA-responsive  
269 pathogenesis-related *PR1* gene upon systemic infection of primed plants. The measurement revealed  
270 that *PR1* expression in systemic leaves of primed *rpt2a-2* and *rpn12a-1* plants was significantly  
271 reduced as compared to the wild type and displayed no induction in primed proteasome mutants as



272 compared to the unprimed control (Figure 5B). Taken together the data indicate that a disturbance of  
273 proteasome function has repercussions on SAR-gene induction.

274

### 275 ***Pseudomonas* T3Es inhibit the proteasome**

276 Given the finding that *Pst* suppresses proteasome activity in dependence of the delivery of T3Es, we  
277 further elucidated this phenomenon by setting up a fast screening system using a collection of *Pst*  
278 T3Es cloned into a binary plant expression vector for transient expression using *Agrobacterium* –  
279 infiltration. In total, we tested 16 *Pst* T3Es after transient expression in *Nicotiana benthamiana* for their  
280 ability to inhibit proteasome activity (Fig. 6A). Effector proteins AvrPto and AvrPtoB were excluded  
281 from this analysis, as previous assays using a *Pst*Δ*avrPto/avrPtoB* deletion strain showed that this  
282 strain was still able to compromise proteasome function (Fig. 2A). This experimental approach  
283 identified four T3Es (HopM1, HopG1, HopAO1 and HopA1) whose expression reproducibly led to  
284 almost 30 to 80% reduction in proteasome activity in *N. benthamiana* leaves (Fig. 6B). Notably, the  
285 inhibitory effect on the proteasome of HopM1, HopG1 and HopA1 in transient assays was even  
286 stronger than that of XopJ, a T3E from *Xanthomonas*, which was shown to inhibit the proteasome by  
287 degrading the RP subunit RPT6 (Üstün and Börnke, 2015). Expression of all T3Es tested was verified  
288 by western blot analysis using an anti-HA antibody (Fig. 6C). The remaining 12 T3Es from *Pst* tested  
289 were not able to suppress proteasome activity (Supp. Fig. S1-6), demonstrating that the interference  
290 with proteasome activity is specific for certain T3Es. This suggests that the proteasome might  
291 represent a virulence target for *Pst* and T3Es from *Pst* either directly or indirectly impede proteasome  
292 function.

293

### 294 **HopM1 inhibits proteasome activity during *Pseudomonas-Arabidopsis* interaction**

295 Because HopM1 inhibits proteasome activity up to 80% and due to previously published work showing  
296 that HopM1 promotes degradation of its target protein AtMIN7 via the 26S proteasome (Nomura et al.,  
297 2006), we further concentrated our efforts on this candidate T3E. To demonstrate that HopM1  
298 interferes with proteasome function during *Pst* infection of *A. thaliana*, we first infected plants with a  
299 *Pst* Δ*CEL* mutant strain that lacks 6 ORFs present in the Conserved Effector Locus (CEL), including  
300 the core T3Es AvrE and HopM1 (Alfano et al., 2000). The *Pst* Δ*CEL* mutant multiplies 200 to 500 fold  
301 less than wildtype *Pst* and fails to produce disease symptoms in Col-0 leaves. Complementation  
302 analysis suggests that ectopic HopM1 expression almost fully complements is mainly responsible for  
303 the *Pst* Δ*CEL* mutant phenotype (Nomura et al., 2006). Measurement of the overall leaf proteasome  
304 activity two days after infection reveals that leaves inoculated with *Pst* Δ*CEL* display proteasome  
305 activity that is comparable to mock control treated leaves (Fig. 7A), indicating that the lack of HopM1  
306 renders *Pst* unable to inhibit proteasome activity during infection below the basal level but is still able  
307 to prevent its induction. Consistent with the activity data on the proteasome, accumulation of  
308 ubiquitinated proteins was also less pronounced compared to *Pst* wild-type infected leaves (Fig. 7B).  
309 Because this conserved effector locus also harbours AvrE, HopAA1-1, and HopN1 besides HopM1,  
310 (Kvitko et al., 2009) we decided to test a *Pst* strain that carries a deletion in HopM1 only, to exclude  
311 possible additional effects of the other T3Es. Infection of *Arabidopsis* plants with this strain provides  
312 evidence that *Pst* Δ*hopM1* is not able to reduce proteasome activity compared to the wild-type

313 *Pseudomonas* strain (Fig. 7C). This is also partially reflected by a reduced accumulation of  
314 ubiquitinated proteins compared to *Pst* wild-infected plants (Fig. 7D). Thus, from this we could  
315 conclude that HopM1 is responsible for the inhibition of proteasome activity during the compatible  
316 interaction of *Pst* and *Arabidopsis*.

317

### 318 **HopM1 interacts with components of the UPS *in-vivo*:**

319 To demonstrate the possible mechanism by which HopM1 reduces the total proteasome activity of the  
320 plant cell, an unbiased proteomics based screening was performed to find the *in vivo* interactions of  
321 HopM1 in *Nicotiana benthamiana*. HopM1 was immunoprecipitated and interacting proteins were  
322 identified using mass spectrometry (LC-MS/MS) analysis. The expression of HopM1 in *Nicotiana* was  
323 confirmed by anti-GFP western blot (Supp. Fig.S7). It was observed that many proteins related to the  
324 ubiquitin-proteasome system were associated with HopM1. The *Nicotiana* orthologs of known HopM1  
325 interactors such as *Arabidopsis* AtMIN7 (a host ADP ribosylation guanine nucleotide exchange factor  
326 involved in membrane traffic), and AtMIN10 (a 14-3-3 protein) were also detected reflecting the  
327 interactions were specific to HopM1 (Nomura et al., 2006). After performing Fisher Exact test ( $p \leq$   
328 0.05), a number of proteins related to 26S proteasome non-ATPase regulatory subunits 2, 3, 6, 12 and  
329 14 were significantly enriched in the two independent screens carried out (**Table 1**). E3 ubiquitin  
330 protein ligases UPL 1 and 3 were also significantly enriched in the screen further suggesting the role  
331 of HopM1 in directly perturbing the proteasome activity of the plant cell. However, the most interesting  
332 protein detected was proteasome-associated protein ECM29, which is known to stop the protein  
333 degradation by inhibiting the proteasomal ATPase activity in yeast (De La Mota-Peynado et al., 2013).  
334 The known target of direct ubiquitination post elicitation includes the flg22 receptor FLS2 (Lu et al.,  
335 2011). To analyse the possible effect of HopM1 induced decrease in proteasome activity on PTI  
336 signaling, the protein levels of FLS2 were analysed in *Arabidopsis* protoplasts transfected with HopM1.  
337 It was observed that the FLS2 levels accumulated in HopM1 expressing protoplasts without any PAMP  
338 elicitation in comparison to control. Significantly higher levels of FLS2 were also observed after longer  
339 (60 min) treatments with flg22 (**Fig. 8**).

340

### 341 **Discussion**

342 Plant immunity has to be tightly regulated to ensure effective immune response activation with minimal  
343 negative effects on plant growth and reproduction. One such way to regulate certain immune  
344 processes is the proteasome-mediated recycling of defence components, highlighting an important  
345 role of the plant proteasome during plant immunity. Thus, evidence has accumulated that the 26S  
346 proteasome regulates plant defence responses at several layers of the surveillance system and hence  
347 constitutes a strategic target for plant pathogens to suppress host immune responses (Marino et al.,  
348 2012; Dudler, 2013).

349 In this study, we show that fully functional proteasome subunits RPT2a and RPN12a are required for  
350 the proper execution of PTI events in locally infected leaves and the establishment of SAR and thus,  
351 are essential for full resistance against *Pseudomonas* bacteria and also for the growth restriction of  
352 virulent bacteria in local and systemic tissue. Furthermore, we could show that *Pst* is able to inhibit  
353 proteasome activity during infection and that this phenomenon is dependent on T3E injection. A

354 systematic screen of a *Pst* T3E collection identified candidate effector proteins for proteasome  
355 interference during a compatible interaction.

356 In the past, the proteasome has mainly been associated with the regulation of plant growth and  
357 development because the UPS plays an essential role in almost all aspects of hormone perception  
358 and signalling and many *Arabidopsis* proteasome subunit mutants show a range of developmental  
359 defects (Kurepa and Smalle, 2008). This is also true for the *Arabidopsis rpt2a-2* and *rpn12a-1* mutants  
360 used in the present study, both of them being part of the 19S RP of the proteasome. The *rpt2a-2*  
361 mutant is affected in root elongation, leaf/organ size, trichome branching, endoreduplication,  
362 inflorescence stem fasciation, and flowering time (Lee et al., 2011), while the *rpn12a-1* mutant shows  
363 decreased rate of leaf formation, reduced root elongation, delayed skotomorphogenesis, and altered  
364 growth responses to exogenous cytokinins (Smalle et al., 2002). However, it is important to mention  
365 that both mutants are characterised by weak defects on overall proteasome function since the RPT2  
366 and RPN12 proteins are encoded by two almost identical genes and the second gene, albeit lower  
367 expressed, remains intact in the mutant plants (Kurepa and Smalle, 2008). Beyond their role in the  
368 regulation of plant growth and development certain proteasome subunits have been implicated to also  
369 play a role during plant immunity. For instance, a mutation in the 19S RP subunit RPN1a was  
370 identified as a suppressor of increased resistance to the adapted biotrophic powdery mildew pathogen  
371 *Golovinomyces cichoracearum* in *EDR2* (*Enhanced Disease Resistance 2*) loss of function mutants  
372 (Yao et al., 2012). The *Arabidopsis rpn1a* single mutant was more susceptible towards local infection  
373 with virulent and avirulent *P. syringae* strains as well as to *G. cichoracearum* (Yao et al., 2012).  
374 Infected *rpn1a* plants displayed a reduction in late defence responses such as the accumulation of the  
375 defence hormone salicylic-acid (SA) and a reduced expression of the defence marker gene *PR1*. The  
376 observation that the *rpt2a* as well as the *rpn12a* mutant show a similar enhanced susceptibility  
377 phenotype and a reduction in *PR1* expression suggests that interference with proteasome function in  
378 general leads to defects in immunity. Another report shows that RPT2a is involved in the defence  
379 response mediated by a CC-NBS- LRR protein (Chung and Tasaka, 2011). In that case, RPT2a  
380 interacts with the resistance protein UNI/uni-1D and a loss of *RPT2a* in the *uni-1D* mutant represses  
381 *PR1* gene expression, which is normally highly induced in the *uni-1D* mutant plants due to the  
382 constitutive activation of the resistance protein (Igari et al., 2008; Chung and Tasaka, 2011).

383 From a number of additional *Arabidopsis* proteasome subunit mutants tested only those affected in  
384 *RPT2a* and *RPN8a* function fully suppressed *edr2*-mediated powdery mildew resistance indicating that  
385 the different proteasome subunits might have distinct roles in mediating plant defence responses (Yao  
386 et al., 2012). Consistent with this scenario, Hatsugai et al. (2009) reported that the proteasome subunit  
387 PBA1 might function as a plant caspase-3-like enzyme, as PBA1 RNAi plants have reduced DEVDase  
388 activity besides a decreased overall proteasome activity (Hatsugai et al., 2009). This defect abolished  
389 the membrane fusion associated with both disease resistance and HR in response avirulent bacterial  
390 strains but not to a virulent strain. As a consequence of this compromised HR, PBA1 RNAi plants  
391 display enhanced susceptibility toward avirulent *Pseudomonas* strains, while the growth of virulent *Pst*  
392 DC3000 is comparable to *Arabidopsis* wild-type plants (Hatsugai et al., 2009).

393 A possible explanation for the enhanced susceptibility phenotype of *rpn1a* plants that has been put  
394 forward is that a defect in proteasome function interferes with the turnover of a regulator of SA

395 signalling and thus, prevents the onset of SA-mediated defence (Yao et al., 2012). A similar scenario  
396 could at least in part explain the compromised immunity in *rpt2a-2* and *rpn12a-1* mutants. A possible  
397 candidate for proteasomal turnover during defence is NPR1, the master regulator of SA signalling that  
398 acts as a transcriptional co-regulator inside the nucleus and whose functionality was shown to be  
399 dependent on continuous proteasomal degradation (Spoel et al., 2009). Compromised NPR1 function  
400 due to reduced proteasomal turnover would also explain the reduced expression of the NPR1-  
401 downstream target gene *PR1* in proteasome mutants.

402 However, proteasomal degradation was also reported for immune components acting at early stages  
403 of PTI, e.g. the receptor kinase FLS2. Recently, it was revealed that FLS2 is ubiquitinated by the E3  
404 ligases PUB12 and 13 leading to its degradation via the proteasome to attenuate immune responses  
405 (Lu et al., 2011). The *pub12* and *pub13* mutants displayed elevated immune responses to flagellin  
406 treatment indicating that these E3 ligases act as negative regulators of PTI. The observation that *rpt2a*  
407 and *rpn12a* plants show a reduced induction of PTI marker genes *WRKY11* and *WRKY29* suggests  
408 that the proteasome can also act as a positive regulator of induced immunity, either at the level of  
409 PAMP perception or downstream signalling into the nucleus. Compromised proteasome function could  
410 for instance interfere with the turnover of regulators of PTI gene induction. It has been shown in rice  
411 (*Oryza sativa*) that WRKY45 degradation via the proteasome is required for the activity of WRKY45 as  
412 a transcriptional activator of certain branches of immunity (Matsushita et al., 2013). The likely  
413 orthologue of rice WRKY45 is WRKY70 in *Arabidopsis* although proteasomal turnover has so far not  
414 been demonstrated to be required for WRKY function in *Arabidopsis* it is conceivable that similar  
415 mechanisms are involved in fine tuning defence gene expression also in this species.

416 The data on the altered kinetics of MAP Kinase phosphorylation further supports the hypothesis that  
417 upstream PRR signalling such as FLS2 degradation could be disturbed in the proteasome mutants,  
418 but does not exclude direct effects of proteasome activity and ubiquitination on MAPKinase signalling.  
419 Generation of ROS also depends on phosphorylation events during the first steps of PAMP  
420 recognition. The plasma-membrane-associated kinase BIK1, which is a direct substrate of the FLS2-  
421 BAK1 complex, directly interacts with and phosphorylates RBOHD, which is the NADPH oxidase that  
422 generates ROS (Kadota et al., 2014). Given the fact that continuous proteasome-mediated  
423 degradation of BIK1 ensures optimal immune outputs (Monaghan et al., 2014), it might be possible  
424 that the proteasomal turnover of this important immune kinase is affected in the *rpt2a-2* and *rpn12a-1*  
425 mutant plants, supporting our findings that ROS production is perturbed in plants with lowered  
426 proteasome activity.

427 Apart from its function in regulating the turnover of components implicated in ROS signalling,  
428 proteasome components have been identified to directly contribute to ROS-mediated defence. In  
429 tobacco, expression of three genes encoding subunits of the 20S proteasome is induced after  
430 treatment with the elicitor cryptogein (Dahan et al., 2001; Suty et al., 2003). Tobacco cell lines  
431 overexpressing the  $\beta 1$  subunit resulted in a decrease of the *NtRbohD* (NADPH oxidase) gene  
432 induction and of its associated oxidative burst after cryptogein treatment, indicating that this subunit  
433 acts as a negative regulator of early plant responses to cryptogein (Lequeu et al., 2005). Because a  
434 loss of *RPT2a* leads to an accumulation of PBA1 (Lee et al., 2011), the homologue of the tobacco  $\beta 1$

435 subunit, it is tempting to speculate that ROS signalling is impaired in these plants similar to the  
436 overexpressing  $\beta 1$  tobacco lines.

437 In addition to a reduced local defence response, *Arabidopsis rpt2a-2* and *rpn12a-1* mutants are also  
438 compromised in the establishment of SAR and defence priming towards a secondary infection with  
439 bacteria. Mounting of SAR requires the generation of signal in locally infected leaves which is  
440 subsequently transmitted to systemic tissue where it is perceived and confers a primed state that  
441 enables a faster and stronger defence response upon a secondary infection (Conrath et al., 2015).  
442 The exact nature of the signal(s) involved in this process is currently up for debate; however, it is  
443 proposed that several hormonal pathways, such as SA, ethylene, auxin and jasmonic acid play a role  
444 in SAR (Pastor et al., 2014). Because of its involvement in nearly all aspects of hormonal signalling it  
445 appears reasonable to assume that the proteasome could play a critical role for the execution of the  
446 different phases of priming. Based on genetic and physiological evidence SA is supposed to play a  
447 pivotal role in SAR (Fu and Dong, 2013). SA-signalling strongly depends on NPR1 as a central  
448 regulator and interference with the proteasomal turnover of NPR1 would thus also affect SAR and  
449 defence priming in *rpt2a-2* and *rpn12a-1* plants. However, recent evidence suggests that the non-  
450 protein amino acid pipecolic acid (pip) is a critical SAR regulator (Navarova et al., 2012). Pip  
451 elevations are indispensable for SAR and necessary for virtually the whole transcriptional SAR  
452 response, although a moderate but significant SA-independent component of SAR activation and SAR  
453 gene expression has recently been revealed (Bernsdorff et al., 2016). Future experiments will have to  
454 clarify at which step the initiation of SAR is affected by a defect in proteasome function.

455 Measurement of the overall proteasome activity in leaves infected with a non-pathogenic *Pst*  $\Delta hrcC$   
456 strain revealed a significant induction of proteasome activity. Thus, increased proteasome activity  
457 appears to be part of the defence response induced by *Pst* bacteria unable to deliver T3Es into the  
458 potential host cell. Consistent with this finding, previous work demonstrated that an *Xcv* strain lacking  
459 a functional T3SS also induced proteasome activity upon infection of pepper plants (Üstün et al.,  
460 2013). This argues for a contribution of early signalling events, such as recognition of PAMPs and  
461 subsequent phosphorylation events, to the induction of the proteasome activity. In accordance with  
462 that, the bacterial PAMP flg22 has been shown to activate proteasome peptidase activity upon  
463 application leading to alteration in posttranslational modifications in certain proteasome subunits (Sun  
464 et al., 2013). Treatment with flg22 also resulted in an accumulation of ubiquitinated proteins (Sun et  
465 al., 2013), which is in line with our observation that massive protein turnover leads to an enhanced  
466 ubiquitination of proteins during PTI.

467 The *npr1-1* mutant that is defective in SA-dependent defence responses does not display induction of  
468 proteasome activity after infection with non-pathogenic *Pst* suggesting that elevation of proteasomal  
469 activity during induced defence depends on the SA-signalling pathway. Previous work implies that SA  
470 acts on the transcriptional level to upregulate the expression of certain subunits of the proteasome  
471 (Yao et al., 2012; Üstün et al., 2013). In addition, post-translational modification of subunits, e.g. by  
472 phosphorylation, would provide a means to rapidly alter the activity or other biochemical properties of  
473 the complex.

474 Virulent *Pst* bacteria that inject the full repertoire of T3Es into their host cell are not only able to  
475 prevent induction of proteasome activity, likely through their ability to interfere with SA-mediated

476 defence, but also suppress it below the basal level detected in the mock treated control. This suggests  
477 that T3Es act to suppress induction of proteasome activity during defence, which likely occurs at  
478 different levels and through different sets of effector proteins. First, the ability to prevent induction of  
479 proteasome activity is consistent with the activity of T3Es acting to suppress SA-mediated defence  
480 responses (Kazan and Lyons, 2014). In addition, in *npr1-1* wild type *Pst* bacteria not only prevent  
481 induction of the proteasome but are also able to further inhibit its activity below the basal threshold  
482 independent of interfering with SA-signalling. This indicates that T3Es also exert a more direct effect  
483 on the proteasome to reduce its activity. The ability to prevent induction of proteasome activity is  
484 independent of the capacity to interfere with very early events of pathogen perception such as the  
485 activation of FLS2 by flg22 because a *Pst* mutant lacking the two effectors AvrPto and AvrPtoB is still  
486 able to prevent elevated activity levels. Several *Pseudomonas* T3Es that have been implicated to  
487 interfere with SA production or signalling. For instance HopI1 has been shown to interfere with SA  
488 synthesis inside chloroplasts preventing its accumulation (Jelenska et al., 2007; Jelenska et al., 2010).  
489 In addition, HopM1 and AvrE are representatives of T3Es which have the ability to suppress SA-  
490 dependent basal immunity and disease necrosis although the targets of these effectors with respect to  
491 SA signalling remain to be discovered (DebRoy et al., 2004). However, the interference with SA  
492 synthesis *per se* seems not to be sufficient to reduce proteasome activity below basal levels as  
493 transient expression of HopI1 in leaves of *N. benthamiana* shows no effect on activity.

494 A direct inhibition of the proteasome through T3Es of *Pst* targeting its components so far has not been  
495 described. However, XopJ a T3E from *X. campestris* pv. *vesicatoria* 85-10 was shown to  
496 proteolytically degrade the 19S RP subunit RPT6 in order to inhibit its activity and to interfere with SA-  
497 mediated defence in susceptible pepper host plants (Üstün et al., 2013; Üstün and Börnke, 2015). A  
498 similar mechanism has been proposed for the T3E HopZ4 from *Pseudomonas syringae* pv.  
499 *lachrymans* (Üstün et al., 2014). Both effectors belong to the YopJ-family which is widespread among  
500 animal and plant pathogens but whose members are absent from *Pst* (Lewis et al., 2011). Also, *Pst*  
501 does not possess SylA, a secreted toxin produced for instance by *P. syringae* pv. *syringae*, which  
502 directly targets the catalytic subunits of the 26S proteasome to inhibit its activity and to suppress plant  
503 immune reactions, such as SA signalling and stomatal immunity (Baltrus et al., 2011; Groll et al., 2008;  
504 Schellenberg et al., 2010; Misas-Villamil et al., 2013). Thus, the suppression of proteasome activity  
505 below the basal level by virulent *Pst* likely involves a yet undescribed effector action. We have  
506 conducted a systematic screen of a collection of *Pst* T3Es for their ability to suppress proteasome  
507 activity when transiently expressed in leaves of *N. benthamiana*. The analyses identified four T3Es,  
508 namely HopM1, HopG1, HopAO1 and HopA1 which reproducibly inhibited the proteasome in *N.*  
509 *benthamiana* and thus represent candidates for effectors interfering with proteasome activity during  
510 infection of *Arabidopsis* with *Pst*. The function of HopG1, HopAO1 and HopA1 so far has not been  
511 shown to be associated with the UPS. HopG1 was demonstrated to inhibit plant innate immunity  
512 associated with its localization to mitochondria (Block et al., 2010), while HopA1 associates with EDS1  
513 to disrupt EDS1-TIR NB LRR disease complexes (Bhattacharjee et al., 2011). As the direct target  
514 proteins for both T3Es are still not known, it is possible that both T3Es could directly or indirectly  
515 associate with the UPS to modulate proteasome activity. Tyrosine phosphatase HopAO1 targets the  
516 *Arabidopsis* receptor kinase EF-TU RECEPTOR (EFR) reducing its phosphorylation and thus

517 inhibiting PTI activation (Macho et al., 2014). Because phosphorylation of certain proteasome subunits  
518 is crucial to activate its assembly and also induce its activity (Sato et al., 2001), it might be possible  
519 that HopAO1 could target components of the proteasome to reduce their phosphorylation status.  
520 Whether this T3E is also able to interact with multiple target proteins in plants, e.g. with components of  
521 the proteasome or other UPS-related proteins will be subject of future studies and clarify its role as a  
522 proteasome inhibitor.

523 The identification of HopM1 as a candidate effector protein for suppression of the proteasome is  
524 striking. This effect is unlikely to be related to its ability to interfere with SA-dependent defence  
525 responses (DebRoy et al., 2004) because a HopM1 deletion strain still prevents induction of  
526 proteasome activity above basal levels. However, in contrast to wild type *Pst*  $\Delta$ *hopM1* bacteria have  
527 lost the ability to suppress proteasome activity below the levels of the mock infected control  
528 suggesting that HopM1 is directly interfering with proteasome function. The discovery of HopM1 as a  
529 proteasome inhibitor apparently contradicts previous findings, where it has been shown that HopM1  
530 promotes the proteasome-dependent degradation of AtMIN7, a host ADP ribosylation factor guanine  
531 nucleotide exchange factor required for vesicle trafficking during PTI and ETI (Nomura et al., 2006;  
532 Nomura et al., 2011). However, AP-MS analysis suggests that HopM1 resides in a complex with  
533 several proteasome subunits, opening the possibility that HopM1 might directly target proteasome  
534 components to interfere with its function. Moreover, using a Y2H approach HopM1 was identified to  
535 interact with RAD23, an ubiquitin receptor that delivers ubiquitinated proteins to the 26S proteasome  
536 for degradation (Nomura et al., 2006). We speculate that this interaction, on the one hand mediates  
537 the degradation of AtMIN7, but on the other hand might affect the recognition of other ubiquitinated  
538 proteins by the 26S proteasome. This could result in an inefficient degradation of other substrates and  
539 could explain why AtMIN7 is removed by the proteasome while overall proteasome activity is down-  
540 regulated. Besides its function to destabilize AtMIN7 and thereby interfering with vesicle trafficking,  
541 HopM1 also has an AtMIN7- independent function: it is able to suppress ROS production and stomatal  
542 closure during plant immunity (Lozano-Duran et al., 2014). The increased protein levels of FLS2  
543 observed in HopM1 expressing cells supports the hypothesis that impaired proteasome activity may  
544 interfere with the proper recycling of the receptor, thereby dampening the PTI response. It is highly  
545 plausible that HopM1 triggers the accumulation of inactive FLS2 receptors in the cells by  
546 compromising the recycling of the ubiquitinated receptor post elicitation. This effect on basal defence  
547 responses is in line with our observations that the proteasome inhibition by genetic means negatively  
548 affects ROS production, defence gene expression and also MAPKinase signalling. Thus, these results  
549 and previous findings suggest that HopM1 suppresses proteasome activity to dampen ROS  
550 generation and suppress stomatal closure to ensure bacterial proliferation during infection.

551 In conclusion, this work further supports the proposition for a prominent role of the proteasome during  
552 early and late defence responses towards *Pseudomonas* and establishes that *Pst* possess T3Es,  
553 which directly or indirectly interfere with proteasome activity during infection. These T3Es may affect  
554 proteasome function through multiple mechanisms by (1) preventing the SA-dependent induction of  
555 activity above basal levels, and (2) through direct interaction with proteasomal components to interfere  
556 with their function. Our experiments have provided candidate T3Es for this second group and future  
557 studies will have to clarify the molecular mechanisms of how these effectors target the proteasome.

## 558 **Material and Methods**

559

### 560 **Plant material and growth conditions**

561 Tobacco plants (*Nicotiana benthamiana*) were grown in soil in a greenhouse with daily watering, and  
562 subjected to a 16 h light : 8 h dark cycle (25°C : 21°C) at 300  $\mu\text{mol m}^{-2} \text{s}^{-1}$  light and 40% relative  
563 humidity. *Arabidopsis thaliana* seeds sown on Murashige and Skoog (MS) agar (Sigma-Aldrich) plates  
564 supplemented with 2% (w/v) sucrose and cultivated in tissue culture under a 16-h-light/8-h-dark  
565 regime (irradiance 150  $\mu\text{mol quanta m}^{-2} \text{s}^{-1}$ ) at 50% humidity. *A. thaliana* seeds germinated on soil  
566 were grown under short day conditions (8h light/16h dark [23 °C/ 21 °C]). The *rpt2-2* and *rpn12a-1*  
567 mutants in the Col-0 background were originally described in Kurepa et al. 2008.

568

### 569 **Cultivation of Bacteria**

570 *Pseudomonas syringae* pv *maculicola* strain ES4326 (*Psm*) and *Pseudomonas syringae* pv. *tomato*  
571 DC3000 (*Pst*) wild-type and deletion strains were grown in King's B medium containing the appropriate  
572 antibiotics at 28°C.

573

### 574 **Assessment of SAR, Defense Priming during SAR, and Local Plant Resistance**

575 The experiments were essentially carried out as detailed in Navarova et al., 2012 with slight  
576 modifications. In brief, for SAR induction, plants were infiltrated into three lower (1°) leaves with a  
577 suspension of *Psm* at OD 0.005. Infiltration with 10mM  $\text{MgCl}_2$  served as a control treatment. For SAR  
578 growth assays, 2° leaves were inoculated with *Psm* (OD 0.001) 2 d after the 1° treatment. Growth of  
579 *Psm* in 2° leaves was scored another 2 d later by homogenizing discs originating from infiltrated areas  
580 of three different leaves, plating appropriate dilutions on King's B medium, and counting colony  
581 numbers after incubating the plates at 28°C for 2 d.

582 For the assessment of defence priming during SAR, 2° leaves were infiltrated with either 10 mM  $\text{MgCl}_2$   
583 or *Psm* (OD = 0.005) 2 d after the 1° treatment. The 2° leaves were collected 10 h after the treatment.

584 For the determination of local defence responses such as gene expression of PR1, bacterial  
585 suspensions of  $1 \times 10^7$  were infiltrated and harvested 24hpi for RNA extraction. For local growth assays  
586 bacterial solution of OD 0.002 (*Pst* and *Psm*) were infiltrated into three full-grown leaves per plant.  
587 Bacterial growth was assessed 2 d after infiltration as described above.

588

### 589 **Transient expression assays**

590 For infiltration of *N. benthamiana* leaves, *A. tumefaciens* C58C1 was infiltrated into the abaxial air  
591 space of 4- to 6-week-old plants, using a needleless 2-ml syringe. Agrobacteria were cultivated  
592 overnight at 28°C in the presence of appropriate antibiotics. The cultures were harvested by  
593 centrifugation, and the pellet was resuspended in sterile water to a final optical density at (OD600) of  
594 1.0. The cells were used for the infiltration directly after resuspension.

595

### 596 **Western blotting**

597 Leaf material was homogenized in sodium-dodecyl sulphate-polyacrylamide gel electrophoresis (SDS-  
598 PAGE) loading buffer (100 mM Tris-HCl, pH 6.8; 9%  $\beta$ -mercaptoethanol, 40% glycerol, 0.0005%



599 bromophenol blue, 4% SDS) and, after heating for 10 min at 95 °C, subjected to gelectrophoresis.  
600 Separated proteins were transferred onto nitrocellulose membrane. Proteins were detected by an anti-  
601 HA-Peroxidase high affinity antibody (Roche), anti-ubiquitin antibody (Agriseria), anti-AtPBA1 (Enzo life  
602 sciences) via chemiluminescence.

603

#### 604 **MAP kinase assay**

605 Arabidopsis seedlings were grown for 12 days on MS agar plates and then transferred to 6-well plates  
606 (4-6 seedlings per well) in which each well contained 4 ml of liquid medium containing liquid 1xMS  
607 media. Seedlings were treated with 1 µM flg22 peptide and after 0 to 30 min as indicated; the  
608 seedlings were frozen in liquid nitrogen. The frozen seedlings were ground in liquid nitrogen and  
609 homogenized in 100 µl of extraction buffer (50 mM Tris-HCl, pH 7.5, 100mM NaCl, 15 mM EGTA, 10  
610 mM MgCl<sub>2</sub>, 1mM Na<sub>2</sub>MoO<sub>4</sub>\*2H<sub>2</sub>O, 0.5 mM NaVO<sub>3</sub>, 1 mM NaF, 30 mM β-glycerolphosphate, 0.5 mM  
611 PMSF, 1 tablet/10 ml extraction buffer of proteinase inhibitor cocktail (Roche) and phosphatase  
612 inhibitor cocktail (Roche)). After centrifugation at 13,000 rpm for 30 min at 4°C, protein concentration  
613 of the supernatants was determined using a Bradford assay. Thirty micrograms of protein was  
614 separated in an 12,5% polyacrylamide gel. Immunoblot analysis was performed using anti-phospho-  
615 p44/42 MAPK (1:1000, Cell Signaling Technology, Danvers, MA, USA) and anti-AtMPK6 (1:2000,  
616 Sigma) as primary antibody, and peroxidase-conjugated goat anti-rabbit antibody (1:5,000, Sigma).

617

#### 618 **ROS assay**

619 Eight leaf discs (4 mm diameter) from four 4-week-old Arabidopsis plants were sampled using a cork  
620 borer and floated overnight on sterile water. The following day the water was replaced with a solution  
621 of 17 mg/mL (w/v) luminol (Sigma) and 10 mg/mL horseradish peroxidase (Sigma) containing 1µM  
622 flg22. Luminescence was captured over 45min using Synergy HT (BioTek Instruments GmbH)  
623 multiplate reader.

624

#### 625 **Measurement of proteasome activity**

626 Proteasome activity in plant extracts was determined spectro-fluorometrically using the fluorogenic  
627 substrate suc-LLVY-NH-AMC (Sigma) according to Üstün et al 2013.

628

#### 629 **RNA Extraction and Expression Analysis**

630 Total RNA was isolated from leafmaterial as described and then treated with RNase-free DNase to  
631 degrade any remaining DNA. First-strand cDNA synthesis was performed from 2 µg of total RNA using  
632 Revert-Aid reverse transcriptase. For quantitative RT-PCR, the cDNAs were amplified using  
633 SensiFAST SYBR Lo-ROX Mix (Bioline GmbH, Luckenwalde) in the AriaMx Realtime PCR System  
634 (Agilent Technologies). PCR was optimized, and reactions were performed in triplicate. The transcript  
635 level was standardized based on cDNA amplification of *UBC9* (ubiquitin carrier protein) as a reference.  
636 Statistical analysis was performed using Student's t test.

637

#### 638 **Protein Extraction and Mass Spectrometry:**

639 Adult *Nicotiana benthamiana* plants were syringe infiltrated with *Agrobacterium* either expressing  
640 HopM1-GFP (HopM1 cloned in pGWB5 vector) or a vector GFP alone. After three days, 10g of plant  
641 tissue was ground in liquid nitrogen and proteins were isolated in extraction buffer (150 mM Tris, pH  
642 7.5, 150 mM NaCl, 10% glycerol, 5 mM EDTA, 2 mM EGTA, 10 mM DTT, 2% [w/v]  
643 polyvinylpyrrolidone, 1% [v/v] Protease Inhibitor Cocktail (PIC, Sigma-Aldrich), 50 mM NaF, 10 mM  
644 Na<sub>2</sub>MoO<sub>4</sub>, 1 mM sodium orthovanadate, 0.5 mM phenylmethylsulphonyl fluoride. After centrifugation at  
645 20,000 rcf at 4°C for 30 min, the supernatants were filtered through a miracloth (Millipore).  
646 Supernatants were incubated for 2 h at 4°C with 200 ul of anti-GFP trap beads (Chromatek). The  
647 beads were washed thrice with 1ml of modified extraction buffer (150 mM Tris, pH 7.5, 150 mM NaCl,  
648 10% glycerol, 5 mM EDTA, 2 mM EGTA and 1% PIC). Proteins were eluted by adding 50 µl of 5x SDS  
649 buffer and boiled for 5-10 min and run on 10% SDS-PAGE gel. The gel was stained with Commassie  
650 colloidal stain (Invitrogen) and proteins from each lane were trypsin digested and subjected to LC-  
651 MS/MS analysis. Reversed phase chromatography was used to separate tryptic peptides prior to mass  
652 spectrometric analysis using an Acclaim PepMap µ-precolumn cartridge 300 µm i.d. x 5 mm 5 µm 100  
653 Å and an Acclaim PepMap RSLC 75 µm x 25 cm 2 µm 100 Å (Thermo Scientific). Peptides were  
654 eluted directly via a Triversa Nanomate nanospray source (Advion Biosciences, NY) into a Thermo  
655 Orbitrap Fusion (Q-OT-qIT, Thermo Scientific) mass spectrometer. The raw data was processed using  
656 MSConvert in ProteoWizard Toolkit (version 3.0.5759)1. MS2 spectra were searched with Mascot  
657 engine (Matrix Science, version 2.4.1) against *Nicotiana benthamiana* database (supplied by The  
658 Sainsbury Laboratory), *Pseudomonas syringae* database (<http://www.uniprot.org/>) and the common  
659 Repository of Adventitious Proteins Database (<http://www.thegpm.org/cRAP/index.html>). Peptides  
660 were generated from a tryptic digestion with up to two missed cleavages, carbamidomethylation of  
661 cysteines as fixed modifications, and oxidation of methionines as variable modifications. Precursor  
662 mass tolerance was 5 ppm and product ions were searched at 0.8 Da tolerances. Scaffold (version  
663 Scaffold\_4.3.2, Proteome Software Inc.) was used to validate MS/MS based peptide and protein  
664 identifications. Peptide identifications were accepted if they could be established at greater than  
665 95.0% probability by the Scaffold Local FDR algorithm.

666

## 667 **Acknowledgements**

668 We thank Susanne Jeserigk for technical assistance, Alan Collmer and Jürgen Zeier for providing  
669 *Pseudomonas* strains. We are grateful to Jan Smalle for providing the *rpt2a-2* and *rpn12a-1* seeds.  
670 We acknowledge the contribution of the Proteomic Research Technology Platform at Warwick  
671 University. Vardis Ntoukakis is supported by the Royal Society. This work was partially funded by  
672 Biotechnology and Biological Science Research Council grant number BB/L019345/1 to Vardis  
673 Ntoukakis.

674

## 675 **References**

676

677 **Alfano JR, Charkowski AO, Deng WL, Badel JL, Petnicki-Ocwieja T, van Dijk K, Collmer A**  
678 (2000) *The Pseudomonas syringae* Hrp pathogenicity island has a tripartite mosaic structure  
679 composed of a cluster of type III secretion genes bounded by exchangeable effector and  
680 conserved effector loci that contribute to parasitic fitness and pathogenicity in plants.

- 681 Proceedings of the National Academy of Sciences of the United States of America **97**: 4856-  
682 4861
- 683 **Baltrus DA, Nishimura MT, Romanchuk A, Chang JH, Mukhtar MS, Cherkis K, Roach J, Grant**  
684 **SR, Jones CD, Dangl JL** (2011) Dynamic evolution of pathogenicity revealed by sequencing  
685 and comparative genomics of 19 *Pseudomonas syringae* isolates. *PLoS Pathog* **7**: e1002132
- 686 **Banfield MJ** (2015) Perturbation of host ubiquitin systems by plant pathogen/pest effector proteins.  
687 *Cell Microbiol* **17**: 18-25
- 688 **Bernsdorff F, Doring AC, Gruner K, Schuck S, Brautigam A, Zeier J** (2016) Pipecolic Acid  
689 Orchestrates Plant Systemic Acquired Resistance and Defense Priming via Salicylic Acid-  
690 Dependent and -Independent Pathways. *Plant Cell* **28**: 102-129
- 691 **Bhattacharjee S, Halane MK, Kim SH, Gassmann W** (2011) Pathogen effectors target Arabidopsis  
692 EDS1 and alter its interactions with immune regulators. *Science* **334**: 1405-1408
- 693 **Block A, Guo M, Li G, Elowsky C, Clemente TE, Alfano JR** (2010) The *Pseudomonas syringae* type  
694 III effector HopG1 targets mitochondria, alters plant development and suppresses plant innate  
695 immunity. *Cell Microbiol* **12**: 318-330
- 696 **Boller T, Felix G** (2009) A renaissance of elicitors: perception of microbe-associated molecular  
697 patterns and danger signals by pattern-recognition receptors. *Annu Rev Plant Biol* **60**: 379-  
698 406
- 699 **Book AJ, Gladman NP, Lee SS, Scalf M, Smith LM, Vierstra RD** (2010) Affinity purification of the  
700 Arabidopsis 26 S proteasome reveals a diverse array of plant proteolytic complexes. *J Biol*  
701 *Chem* **285**: 25554-25569
- 702 **Cao H, Glazebrook J, Clarke JD, Volko S, Dong X** (1997) The Arabidopsis NPR1 gene that controls  
703 systemic acquired resistance encodes a novel protein containing ankyrin repeats. *Cell* **88**: 57-  
704 63
- 705 **Chung K, Tasaka M** (2011) RPT2a, a 26S proteasome AAA-ATPase, is directly involved in  
706 Arabidopsis CC-NBS-LRR protein uni-1D-induced signaling pathways. *Plant Cell Physiol* **52**:  
707 1657-1664
- 708 **Conrath U, Beckers GJ, Langenbach CJ, Jaskiewicz MR** (2015) Priming for enhanced defense.  
709 *Annu Rev Phytopathol* **53**: 97-119
- 710 **Cunnac S, Chakravarthy S, Kvitko BH, Russell AB, Martin GB, Collmer A** (2011) Genetic  
711 disassembly and combinatorial reassembly identify a minimal functional repertoire of type III  
712 effectors in *Pseudomonas syringae*. *Proc Natl Acad Sci U S A* **108**: 2975-2980
- 713 **Dahan J, Etienne P, Petitot AS, Houot V, Blein JP, Suty L** (2001) Cryptogein affects expression of  
714 alpha3, alpha6 and beta1 20S proteasome subunits encoding genes in tobacco. *J Exp Bot* **52**:  
715 1947-1948
- 716 **De La Mota-Peynado A, Lee SY, Pierce BM, Wani P, Singh CR, Roelofs J** (2013) The proteasome-  
717 associated protein Ecm29 inhibits proteasomal ATPase activity and in vivo protein  
718 degradation by the proteasome. *J Biol Chem* **288**: 29467-29481
- 719 **DebRoy S, Thilmony R, Kwack YB, Nomura K, He SY** (2004) A family of conserved bacterial  
720 effectors inhibits salicylic acid-mediated basal immunity and promotes disease necrosis in  
721 plants. *Proc Natl Acad Sci U S A* **101**: 9927-9932
- 722 **Dudler R** (2013) Manipulation of Host Proteasomes as a Virulence Mechanism of Plant Pathogens.  
723 *Annu Rev Phytopathol*
- 724 **Fu ZQ, Dong X** (2013) Systemic acquired resistance: turning local infection into global defense. *Annu*  
725 *Rev Plant Biol* **64**: 839-863
- 726 **Gomez-Gomez L, Boller T** (2000) FLS2: an LRR receptor-like kinase involved in the perception of the  
727 bacterial elicitor flagellin in Arabidopsis. *Mol Cell* **5**: 1003-1011
- 728 **Groll M, Schellenberg B, Bachmann AS, Archer CR, Huber R, Powell TK, Lindow S, Kaiser M,**  
729 **Dudler R** (2008) A plant pathogen virulence factor inhibits the eukaryotic proteasome by a  
730 novel mechanism. *Nature* **452**: 755-758
- 731 **Gruner K, Griebel T, Navarova H, Attaran E, Zeier J** (2013) Reprogramming of plants during  
732 systemic acquired resistance. *Front Plant Sci* **4**: 252
- 733 **Gu C, Kolodziejek I, Misas-Villamil J, Shindo T, Colby T, Verdoes M, Richau KH, Schmidt J,**  
734 **Overkleef HS, van der Hoorn RA** (2010) Proteasome activity profiling: a simple, robust and  
735 versatile method revealing subunit-selective inhibitors and cytoplasmic, defense-induced  
736 proteasome activities. *Plant J* **62**: 160-170
- 737 **Hatsugai N, Iwasaki S, Tamura K, Kondo M, Fujii K, Ogasawara K, Nishimura M, Hara-Nishimura**  
738 **I** (2009) A novel membrane fusion-mediated plant immunity against bacterial pathogens.  
739 *Genes Dev* **23**: 2496-2506
- 740 **He P, Shan L, Lin NC, Martin GB, Kemmerling B, Nurnberger T, Sheen J** (2006) Specific bacterial  
741 suppressors of MAMP signaling upstream of MAPKKK in Arabidopsis innate immunity. *Cell*  
742 **125**: 563-575

- 743 **Hofius D, Tsitsigiannis DI, Jones JD, Mundy J** (2007) Inducible cell death in plant immunity. *Semin*  
744 *Cancer Biol* **17**: 166-187
- 745 **Igari K, Endo S, Hibara K, Aida M, Sakakibara H, Kawasaki T, Tasaka M** (2008) Constitutive  
746 activation of a CC-NB-LRR protein alters morphogenesis through the cytokinin pathway in  
747 *Arabidopsis*. *Plant J* **55**: 14-27
- 748 **Jelenska J, van Hal JA, Greenberg JT** (2010) *Pseudomonas syringae* hijacks plant stress  
749 chaperone machinery for virulence. *Proc Natl Acad Sci U S A* **107**: 13177-13182
- 750 **Jelenska J, Yao N, Vinatzer BA, Wright CM, Brodsky JL, Greenberg JT** (2007) A J domain  
751 virulence effector of *Pseudomonas syringae* remodels host chloroplasts and suppresses  
752 defenses. *Curr Biol* **17**: 499-508
- 753 **Jones JD, Dangl JL** (2006) The plant immune system. *Nature* **444**: 323-329
- 754 **Kadota Y, Sklenar J, Derbyshire P, Stransfeld L, Asai S, Ntoukakis V, Jones JD, Shirasu K,**  
755 **Menke F, Jones A, Zipfel C** (2014) Direct regulation of the NADPH oxidase RBOHD by the  
756 PRR-associated kinase BIK1 during plant immunity. *Mol Cell* **54**: 43-55
- 757 **Kazan K, Lyons R** (2014) Intervention of Phytohormone Pathways by Pathogen Effectors. *Plant Cell*  
758 **26**: 2285-2309
- 759 **Kurepa J, Smalle JA** (2008) Structure, function and regulation of plant proteasomes. *Biochimie* **90**:  
760 324-335
- 761 **Kvitko BH, Park DH, Velasquez AC, Wei CF, Russell AB, Martin GB, Schneider DJ, Collmer A**  
762 (2009) Deletions in the repertoire of *Pseudomonas syringae* pv. *tomato* DC3000 type III  
763 secretion effector genes reveal functional overlap among effectors. *PLoS Pathog* **5**: e1000388
- 764 **Lee KH, Minami A, Marshall RS, Book AJ, Farmer LM, Walker JM, Vierstra RD** (2011) The RPT2  
765 subunit of the 26S proteasome directs complex assembly, histone dynamics, and  
766 gametophyte and sporophyte development in *Arabidopsis*. *Plant Cell* **23**: 4298-4317
- 767 **Lequeu J, Simon-Plas F, Fromentin J, Etienne P, Petitot AS, Blein JP, Suty L** (2005) Proteasome  
768 comprising a beta1 inducible subunit acts as a negative regulator of NADPH oxidase during  
769 elicitation of plant defense reactions. *FEBS Lett* **579**: 4879-4886
- 770 **Lewis JD, Lee A, Ma W, Zhou H, Guttman DS, Desveaux D** (2011) The YopJ superfamily in plant-  
771 associated bacteria. *Mol Plant Pathol* **12**: 928-937
- 772 **Lozano-Duran R, Bourdais G, He SY, Robatzek S** (2014) The bacterial effector HopM1 suppresses  
773 PAMP-triggered oxidative burst and stomatal immunity. *New Phytol* **202**: 259-269
- 774 **Lu D, Lin W, Gao X, Wu S, Cheng C, Avila J, Heese A, Devarenne TP, He P, Shan L** (2011) Direct  
775 ubiquitination of pattern recognition receptor FLS2 attenuates plant innate immunity. *Science*  
776 **332**: 1439-1442
- 777 **Macho AP** (2016) Subversion of plant cellular functions by bacterial type-III effectors: beyond  
778 suppression of immunity. *New Phytol* **210**: 51-57
- 779 **Macho AP, Schwessinger B, Ntoukakis V, Brutus A, Segonzac C, Roy S, Kadota Y, Oh MH,**  
780 **Sklenar J, Derbyshire P, Lozano-Duran R, Malinovsky FG, Monaghan J, Menke FL,**  
781 **Huber SC, He SY, Zipfel C** (2014) A bacterial tyrosine phosphatase inhibits plant pattern  
782 recognition receptor activation. *Science* **343**: 1509-1512
- 783 **Marino D, Peeters N, Rivas S** (2012) Ubiquitination during plant immune signaling. *Plant Physiol* **160**:  
784 15-27
- 785 **Matsushita A, Inoue H, Goto S, Nakayama A, Sugano S, Hayashi N, Takatsuji H** (2012) The  
786 nuclear ubiquitin proteasome degradation affects WRKY45 function in the rice defense  
787 program. *Plant J*
- 788 **Misas-Villamil JC, Kolodziejek I, Crabill E, Kaschani F, Niessen S, Shindo T, Kaiser M, Alfano**  
789 **JR, van der Hoorn RA** (2013) *Pseudomonas syringae* pv. *syringae* uses proteasome inhibitor  
790 syringolin A to colonize from wound infection sites. *PLoS Pathog* **9**: e1003281
- 791 **Mishina TE, Zeier J** (2006) The *Arabidopsis* flavin-dependent monooxygenase FMO1 is an essential  
792 component of biologically induced systemic acquired resistance. *Plant Physiol* **141**: 1666-  
793 1675
- 794 **Monaghan J, Matschi S, Shorinola O, Rovenich H, Matei A, Segonzac C, Malinovsky FG,**  
795 **Rathjen JP, MacLean D, Romeis T, Zipfel C** (2014) The calcium-dependent protein kinase  
796 CPK28 buffers plant immunity and regulates BIK1 turnover. *Cell Host Microbe* **16**: 605-615
- 797 **Navarova H, Bernsdorff F, Doring AC, Zeier J** (2012) Picecolic acid, an endogenous mediator of  
798 defense amplification and priming, is a critical regulator of inducible plant immunity. *Plant Cell*  
799 **24**: 5123-5141
- 800 **Nicaise V, Roux M, Zipfel C** (2009) Recent advances in PAMP-triggered immunity against bacteria:  
801 pattern recognition receptors watch over and raise the alarm. *Plant Physiol* **150**: 1638-1647
- 802 **Nomura K, Debroy S, Lee YH, Pumplin N, Jones J, He SY** (2006) A bacterial virulence protein  
803 suppresses host innate immunity to cause plant disease. *Science* **313**: 220-223

- 804 **Nomura K, Mecey C, Lee YN, Imboden LA, Chang JH, He SY** (2011) Effector-triggered immunity  
805 blocks pathogen degradation of an immunity-associated vesicle traffic regulator in  
806 *Arabidopsis*. *Proc Natl Acad Sci U S A* **108**: 10774-10779
- 807 **Pastor V, Balmer A, Gamir J, Flors V, Mauch-Mani B** (2014) Preparing to fight back: generation and  
808 storage of priming compounds. *Front Plant Sci* **5**: 295
- 809 **Sadanandom A, Bailey M, Ewan R, Lee J, Nelis S** (2012) The ubiquitin-proteasome system: central  
810 modifier of plant signalling. *New Phytol* **196**: 13-28
- 811 **Satoh K, Sasajima H, Nyoomura KI, Yokosawa H, Sawada H** (2001) Assembly of the 26S  
812 proteasome is regulated by phosphorylation of the p45/Rpt6 ATPase subunit. *Biochemistry*  
813 **40**: 314-319
- 814 **Schellenberg B, Ramel C, Dudler R** (2010) *Pseudomonas syringae* virulence factor syringolin A  
815 counteracts stomatal immunity by proteasome inhibition. *Mol Plant Microbe Interact* **23**: 1287-  
816 1293
- 817 **Singer AU, Schulze S, Skarina T, Xu X, Cui H, Eschen-Lippold L, Egler M, Srikumar T, Raught B,**  
818 **Lee J, Scheel D, Savchenko A, Bonas U** (2013) A pathogen type III effector with a novel E3  
819 ubiquitin ligase architecture. *PLoS Pathog* **9**: e1003121
- 820 **Smalle J** (2002) Cytokinin Growth Responses in *Arabidopsis* Involve the 26S Proteasome Subunit  
821 RPN12. *The Plant Cell Online* **14**: 17-32
- 822 **Smalle J, Vierstra RD** (2004) The ubiquitin 26S proteasome proteolytic pathway. *Annu Rev Plant Biol*  
823 **55**: 555-590
- 824 **Spoel SH, Mou Z, Tada Y, Spivey NW, Genschik P, Dong X** (2009) Proteasome-mediated turnover  
825 of the transcription coactivator NPR1 plays dual roles in regulating plant immunity. *Cell* **137**:  
826 860-872
- 827 **Stegmann M, Anderson RG, Ichimura K, Pecenkova T, Reuter P, Zarsky V, McDowell JM,**  
828 **Shirasu K, Trujillo M** (2012) The ubiquitin ligase PUB22 targets a subunit of the exocyst  
829 complex required for PAMP-triggered responses in *Arabidopsis*. *Plant Cell* **24**: 4703-4716
- 830 **Sun HH, Fukao Y, Ishida S, Yamamoto H, Maekawa S, Fujiwara M, Sato T, Yamaguchi J** (2013)  
831 Proteomics analysis reveals a highly heterogeneous proteasome composition and the post-  
832 translational regulation of peptidase activity under pathogen signaling in plants. *J Proteome*  
833 *Res* **12**: 5084-5095
- 834 **Suty L, Lequeu J, Lançon A, Etienne P, Petitot A-S, Blein J-P** (2003) Preferential induction of 20S  
835 proteasome subunits during elicitation of plant defense reactions: towards the characterization  
836 of "plant defense proteasomes". *The International Journal of Biochemistry & Cell Biology* **35**:  
837 637-650
- 838 **Trujillo M, Ichimura K, Casais C, Shirasu K** (2008) Negative regulation of PAMP-triggered immunity  
839 by an E3 ubiquitin ligase triplet in *Arabidopsis*. *Curr Biol* **18**: 1396-1401
- 840 **Üstün S, Bartetzko V, Börnke F** (2013) The *Xanthomonas campestris* Type III Effector XopJ Targets  
841 the Host Cell Proteasome to Suppress Salicylic-Acid Mediated Plant Defence. *PLoS Pathog* **9**:  
842 e1003427
- 843 **Üstün S, Börnke F** (2014) Interactions of *Xanthomonas* type-III effector proteins with the plant  
844 ubiquitin and ubiquitin-like pathways. *Front Plant Sci* **5**: 736
- 845 **Üstün S, Börnke F** (2015) The *Xanthomonas campestris* type III effector XopJ proteolytically  
846 degrades proteasome subunit RPT6. *Plant Physiol* **168**: 107-119
- 847 **Üstün S, König P, Guttman DS, Börnke F** (2014) HopZ4 from *Pseudomonas syringae*, a Member of  
848 the HopZ Type III Effector Family from the YopJ Superfamily, Inhibits the Proteasome in  
849 Plants. *Mol Plant Microbe Interact* **27**: 611-623
- 850 **Vierstra RD** (2009) The ubiquitin-26S proteasome system at the nexus of plant biology. *Nat Rev Mol*  
851 *Cell Biol* **10**: 385-397
- 852 **Yao C, Wu Y, Nie H, Tang D** (2012) RPN1a, a 26S proteasome subunit, is required for innate  
853 immunity in *Arabidopsis*. *Plant J* **71**: 1015-1028
- 854

## 855 **Figure Legends**

856

857 **Figure 1.** *Pseudomonas syringae* DC3000 prevents induction of proteasome activity during basal  
858 defense in a T3SS dependent manner. **(A)** Proteasome activity in leaves of *Arabidopsis* plants  
859 infected with either *Pst* wild type bacteria or infected with a *Pst*  $\Delta$ *hrcC* strain lacking a functional T3SS.  
860 Samples were taken 2 dpi and the relative proteasome activity was determined. Each bar represents  
861 the mean of 3 biological replicates  $\pm$  SD. MgCl<sub>2</sub> infiltration serves as a mock control. Asterisks indicate

862 a statistical difference according to student's *t*-test (\*\*\*,  $P < 0.001$ ) in comparison to mock control. The  
863 experiment was repeated three times with similar results. **(B)** Accumulation of ubiquitinated proteins in  
864 *Arabidopsis* leaves after infection with different *Pst* strains (upper panel) and accumulation of the 20S  
865 subunit PBA1 (lower panel).  
866

867 **Figure 2.** Suppression of proteasome induction by *Pseudomonas syringae* DC3000 is independent of  
868 the ability to suppress PTI and does not require a functional SA-signaling pathway. **(A)** Proteasome  
869 activity in *Arabidopsis* leaves infected with a *Pst* strain impaired in the inhibition of PTI  
870 ( $\Delta avrpto/avrptoB$ ) compared to wild type and a T3SS deficient strain (*Pst*  $\Delta hrcC$ ). Samples were taken  
871 2 dpi and the relative proteasome activity was determined. Each bar represents the mean of 3  
872 biological replicates  $\pm$  SD.  $MgCl_2$  infiltration serves as a mock control. Asterisks indicate a statistical  
873 difference according to student's *t*-test (\*\*\*,  $P < 0.001$ ). **(B)** Proteasome activity in leaves of *npr1-1*  
874 *Arabidopsis* plants 2 dpi with different *Pst* strains. Each bar represents the mean of 3 biological  
875 replicates  $\pm$  SD.  $MgCl_2$  infiltration serves as a mock control. Asterisks indicate a statistical difference  
876 according to student's *t*-test (\*\*\*,  $P < 0.001$ ).

877

878 **Figure 3.** *Arabidopsis* mutant lines defective in different proteasome subunits display enhanced  
879 susceptibility towards infection with *Pst* DC3000 and *Psm*. **(A)** Bacterial density in leaves of different  
880 *Arabidopsis* genotypes infected with *Psm*. Leaves were syringe infiltrated with  $1 \times 10^5$  cfu/mL of  
881 bacteria and bacterial multiplication was determined at 2 dpi. Each bar represents the mean of 3  
882 biological replicates  $\pm$  SD. Asterisks indicate a statistical difference according to student's *t*-test (\*\*,  $P$   
883  $< 0.01$ ; \*,  $P < 0.05$ ). **(B)** Phenotype of *Psm* infected *Arabidopsis* leaves 2 dpi. **(C)** Bacterial density in  
884 leaves of different *Arabidopsis* genotypes infected with *Pst* DC3000. Leaves were syringe infiltrated  
885 with a bacterial suspension of  $1 \times 10^5$  cfu/mL and *in planta* bacterial populations were determined 2  
886 dpi. Each bar represents the mean of 3 biological replicates  $\pm$  SD. Asterisks indicate a statistical  
887 difference according to student's *t*-test (\*,  $P < 0.05$ ). **(D)** Phenotype of *Psm* infected *Arabidopsis*  
888 leaves 2 dpi. **(E)** Bacterial multiplication of an avirulent *Pst*  $\Delta hrcC$  strain is enhanced in leaves of  
889 *Arabidopsis* proteasome mutant lines. Leaves were syringe infiltrated with a bacterial suspension of  $1$   
890  $\times 10^5$  cfu/mL and bacterial multiplication was determined 2 dpi. Each bar represents the mean of 3  
891 biological replicates  $\pm$  SD. Asterisks indicate a statistical difference according to student's *t*-test (\*,  $P <$   
892  $0.05$ ).

893

894 **Figure 4.** The proteasome is required for PAMP-Triggered Responses. **(A)** Total production of ROS in  
895 relative light units (RLU) during treatment with  $1\mu M$  flg22 for 45 min. Each bar represents the mean of  
896 4 biological replicates  $\pm$  SD. Statistical significance compared with Col-0 plants treated with flg22 is  
897 indicated by asterisks (Student's *t* test; \*\* $P < 0.01$ ). ROS production was evaluated in at least two  
898 independent experiments with similar results. **(B)** Quantitative RT-PCR of ROS (*RboHD*) after flg22  
899 treatment is reduced in proteasome mutants. Plants were treated with  $1\mu M$  flg22 or water (control).  
900 *UBC9* was used as a reference gene. Similar results were obtained in three independent experiments.  
901 Each bar represents the mean of 3 biological replicates  $\pm$  SD. Changes in fold expression are  
902 significant for all genes in comparison to the wild type (+flg22) according to student's *t*-test (\*\*,  $P <$

903 0.01; \*,  $P < 0.05$ ) **(C)** MAP Kinase signaling is comprised in proteasome mutant lines. Twelve-day-old  
904 seedlings were treated with 1  $\mu\text{M}$  flg22 and samples were collected 0 to 30 min after treatment as  
905 indicated. Activated MAPKs were detected by immunoblotting using anti-p44/42 MAPK antibody.  
906 Proteins were also detected with anti-AtMPK6 antibody and amido black staining shows equal loading.  
907 Experiments were conducted twice with similar results. **(D, E)** PAMP-dependent induction of PTI  
908 marker genes is impaired in *Arabidopsis* proteasome mutant plants. Quantitative RT-PCR of immune  
909 response marker genes (*WRKY11* and *WRKY29*) 60 min after flg22 treatment. Plants were treated  
910 with 1  $\mu\text{M}$  flg22 or water (control). *UBC9* was used as a reference gene. Similar results were obtained  
911 in three independent experiments. Each bar represents the mean of 3 biological replicates  $\pm$  SD.  
912 Changes in fold expression are significant for all genes in comparison to the wild type (+flg22)  
913 according to student's t-test (\*\*,  $P < 0.01$ ; \*,  $P < 0.05$ ). **(F)** Relative *PR1* expression is decreased in  
914 proteasome mutant lines in response to *Pst* infection. Plants were infiltrated with *Pst* and gene  
915 expression was analyzed 24hpi. Each bar represents the mean of 3 biological replicates  $\pm$  SD.  
916 Changes in gene expression are significant for all genes in comparison to the wild type (+*Pst* infection)  
917 according to student's t-test (\*\*,  $P, 0.01$ ; \*\*\*,  $P, 0.001$ ).

918

919 **Figure 5.** The proteasome is required for systemic acquired resistance. **(A)** SAR assay in Col-0, *rpt2a*-  
920 2, and *rpn12a-1* plants. Lower (1°) leaves were infiltrated with either 10 mM  $\text{MgCl}_2$  or *Psm* (OD  
921 0.005), and 2 d later, three upper leaves (2°) were challenge infected with *Psm* (OD 0.001). Bacterial  
922 growth in upper leaves was assessed 2 d after 2° leaf inoculation. Bars represent the mean of 3  
923 biological replicates  $\pm$  SD. Asterisks denote statistically significant differences between indicated  
924 samples (\*  $P < 0.05$ ; ns, not significant; two-tailed t-test). **(B)** SAR priming of defense gene  
925 expression. Relative *ALD1*, *FMO1*, and *PR1* expression at 10 h after 2° treatment. Transcript levels  
926 were assessed by quantitative real-time PCR analysis, from three replicate samples ( $n=3$ ). SD.  
927 Significant differences in comparisons to Col-0 (*Psm/Psm* infected) were calculated using Student's t-  
928 test and are indicated by: \*,  $P, 0.05$ ; \*\*,  $P, 0.01$ .

929

930 **Figure 6.** Type-III effectors from *Pst* DC3000 suppress proteasome activity in *N. benthamiana*. **(A)**  
931 Table of candidate effectors tested for their ability to modulate proteasome function. **(B)** Transient  
932 expression of T3Es HopM1, HopG1, HopAO1 and HopA1 in *Nicotiana benthamiana* inhibits  
933 proteasome activity. Proteasome activity in *N. benthamiana* leaves following transient expression of  
934 T3Es XopJ, HopM1, HopG1, HopA1, HopAO1 or empty vector control (EV). Relative proteasome  
935 activity in total protein extracts was determined by monitoring the breakdown of the fluorogenic peptide  
936 suc-LLVY-AMC at 30°C in a fluorescence spectrophotometer. EV was set to 100%. Data represent the  
937 mean  $\pm$  standard deviation (SD) ( $n = 3$ ). Asterisks indicate statistical significance (\* $P < 0.05$ , \*\* $P < 0.01$ ,  
938 \*\*\* $P < 0.001$ ) determined by Student's t test (compared with EV control). **(C)** Protein extracts from *N.*  
939 *benthamiana* leaves transiently expressing T3Es tagged with HA and empty vector (EV) at 48 hpi were  
940 prepared. Equal volumes representing approximately equal protein amounts of each extract were  
941 immunoblotted and proteins were detected using anti-HA antiserum. Amido black staining served as a  
942 loading control.

943

944 **Figure 7.** *Pseudomonas* T3E HopM1 is required for proteasome inhibition during *Pst* DC3000-  
945 *Arabidopsis* interaction. **(A)** Proteasome activity in leaves of *Arabidopsis* plants infected with either *Pst*  
946 wild type bacteria, *Pst*  $\Delta hrcC$  and *Pst*  $\Delta CEL$  strain lacking the conserved effector locus harboring  
947 HopM1. Samples were taken 2 dpi and the relative proteasome activity was determined. Each bar  
948 represents the mean of 3 biological replicates  $\pm$  SD. MgCl<sub>2</sub> infiltration serves as a mock control.  
949 Asterisks indicate a statistical difference according to student's *t*-test (\* *P* < 0.05; \*\*\*, *P* < 0.001). The  
950 experiment was repeated three times with similar results. **(B)** Accumulation of ubiquitinated proteins in  
951 *Arabidopsis* leaves after infection with different *Pst* strains indicated in the figure was determined using  
952 an anti-ubiquitin antibody. **(C)** Proteasome activity in leaves of *Arabidopsis* plants infected with either  
953 *Pst* wild type bacteria, *Pst*  $\Delta hrcC$  and *Pst*  $\Delta hopM1$ . Samples were taken 2 dpi and the relative  
954 proteasome activity was determined. Each bar represents the mean of 3 biological replicates  $\pm$  SD.  
955 MgCl<sub>2</sub> infiltration serves as a mock control. Asterisks indicate a statistical difference according to  
956 student's *t*-test (\* *P* < 0.05). The experiment was repeated two times with similar results. **(D)**  
957 Accumulation of ubiquitinated proteins in *Arabidopsis* leaves after infection with different *Pst* strains  
958 indicated in the figure was determined using an anti-ubiquitin antibody.

959

960 **TABLE 1:** List of UPS related proteins co-immunoprecipitated with HopM1. The significant values  
961 (Fisher Exact test  $p \leq 0.05$ ) are indicated by Green color.

962

963 **Figure 8.** HopM1 leads to the accumulation of FLS2 protein. Western blot showing the protein levels  
964 in *Arabidopsis* Col-0 protoplasts transformed with either control or HopM1-HA using FLS2-specific  
965 antibody. The protoplasts were harvested after treating with water as control or 100 nM flg22 for 1 h.



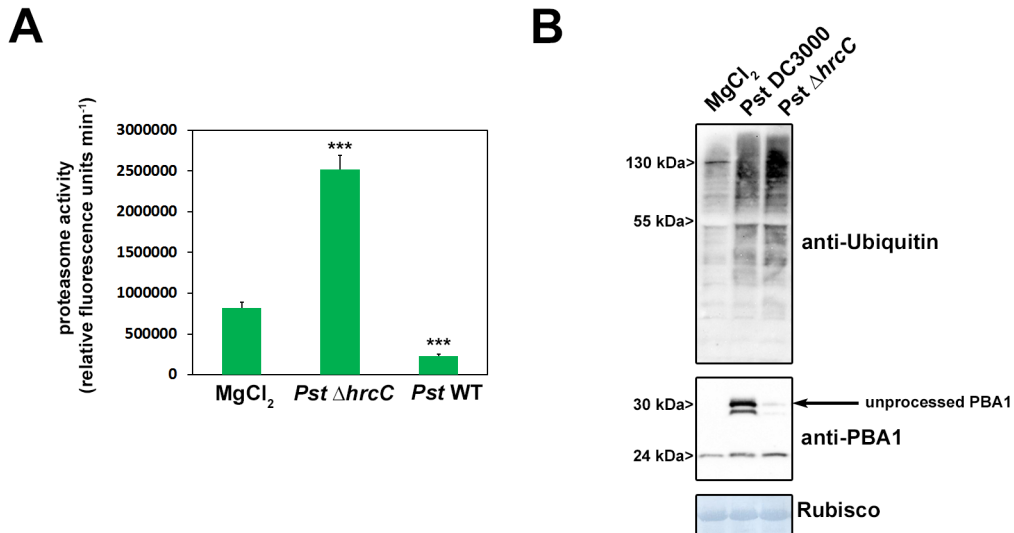

**Figure 1.** *Pseudomonas syringae* DC3000 prevents induction of proteasome activity during basal defense in a T3SS dependent manner. **(A)** Proteasome activity in leaves of *Arabidopsis* plants infected with either *Pst* wild type bacteria or infected with a *Pst* Δ*hrcC* strain lacking a functional T3SS. Samples were taken 2 dpi and the relative proteasome activity was determined. Each bar represents the mean of 3 biological replicates ± SD. MgCl<sub>2</sub> infiltration serves as a mock control. Asterisks indicate a statistical difference according to student's *t*-test (\*\*\*, *P* < 0.001) in comparison to mock control. The experiment was repeated three times with similar results. **(B)** Accumulation of ubiquitinated proteins in *Arabidopsis* leaves after infection with different *Pst* strains (upper panel) and accumulation of the 20S subunit PBA1 (lower panel).

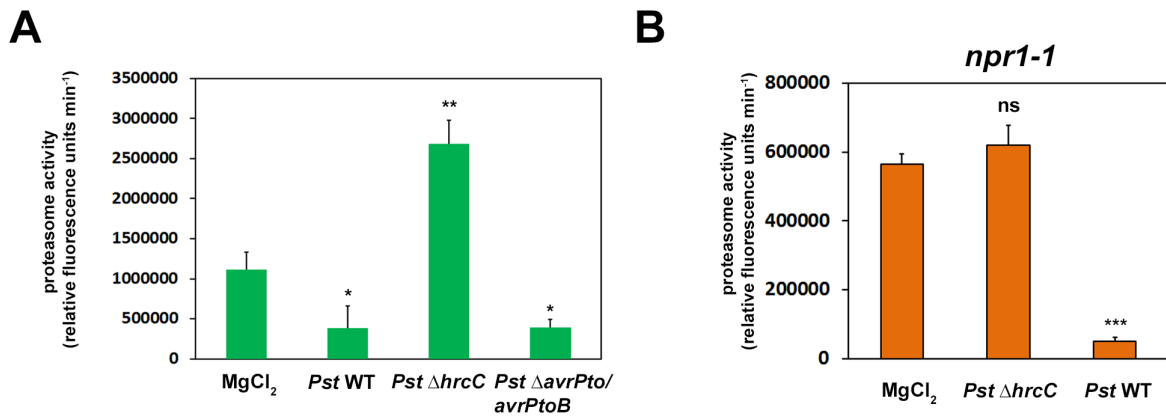

**Figure 2.** Suppression of proteasome induction by *Pseudomonas syringae* DC3000 is independent of the ability to suppress PTI and does not require a functional SA-signaling pathway. **(A)** Proteasome activity in *Arabidopsis* leaves infected with a *Pst* strain impaired in the inhibition of PTI ( $\Delta$ avrpto/avrptoB) compared to wild type and a T3SS deficient strain (*Pst*  $\Delta$ hrcC). Samples were taken 2 dpi and the relative proteasome activity was determined. Each bar represents the mean of 3 biological replicates  $\pm$  SD. MgCl<sub>2</sub> infiltration serves as a mock control. Asterisks indicate a statistical difference according to student's t-test (\*\*\*,  $P < 0.001$ ). **(B)** Proteasome activity in leaves of *npr1-1* *Arabidopsis* plants 2 dpi with different *Pst* strains. Each bar represents the mean of 3 biological replicates  $\pm$  SD. MgCl<sub>2</sub> infiltration serves as a mock control. Asterisks indicate a statistical difference according to student's t-test (\*\*\*,  $P < 0.001$ ).

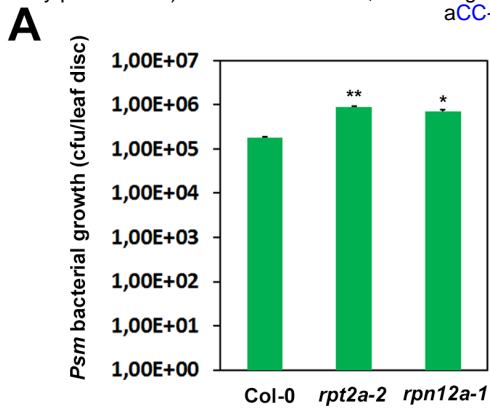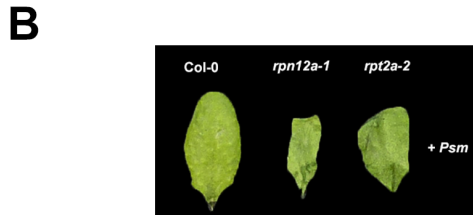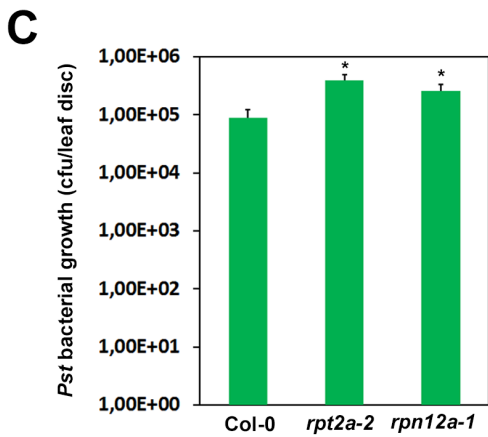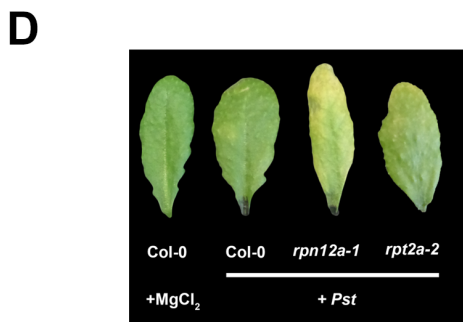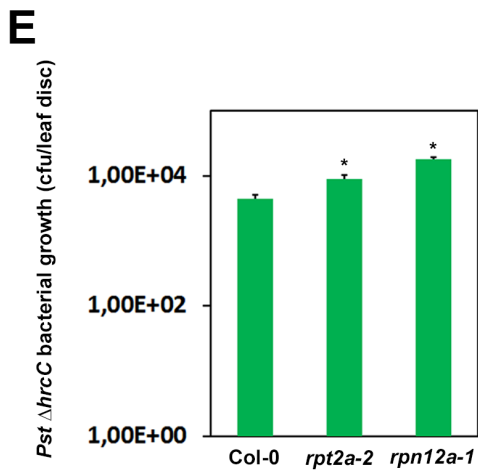

**Figure 3.** *Arabidopsis* mutant lines defective in different proteasome subunits display enhanced susceptibility towards infection with *Pst* DC3000 and *Psm*. **(A)** Bacterial density in leaves of different *Arabidopsis* genotypes infected with *Psm*. Leaves were syringe infiltrated with  $1 \times 10^5$  cfu/mL of bacteria and bacterial multiplication was determined at 2 dpi. Each bar represents the mean of 3 biological replicates  $\pm$  SD. Asterisks indicate a statistical difference according to student's t-test (\*\*,  $P < 0.01$ ; \*,  $P < 0.05$ ). **(B)** Phenotype of *Psm* infected *Arabidopsis* leaves 2 dpi. **(C)** Bacterial density in leaves of different *Arabidopsis* genotypes infected with *Pst* DC3000. Leaves were syringe infiltrated with a bacterial suspension of  $1 \times 10^5$  cfu/mL and *in planta* bacterial populations were determined 2 dpi. Each bar represents the mean of 3 biological replicates  $\pm$  SD. Asterisks indicate a statistical difference according to student's t-test (\*,  $P < 0.05$ ). **(D)** Phenotype of *Psm* infected *Arabidopsis* leaves 2 dpi. **(E)** Bacterial multiplication of an avirulent *Pst*  $\Delta hrcC$  strain is enhanced in leaves of *Arabidopsis* proteasome mutant lines. Leaves were syringe infiltrated with a bacterial suspension of  $1 \times 10^5$  cfu/mL and bacterial multiplication was determined 2 dpi. Each bar represents the mean of 3 biological replicates  $\pm$  SD. Asterisks indicate a statistical difference according to student's t-test (\*,  $P < 0.05$ ).

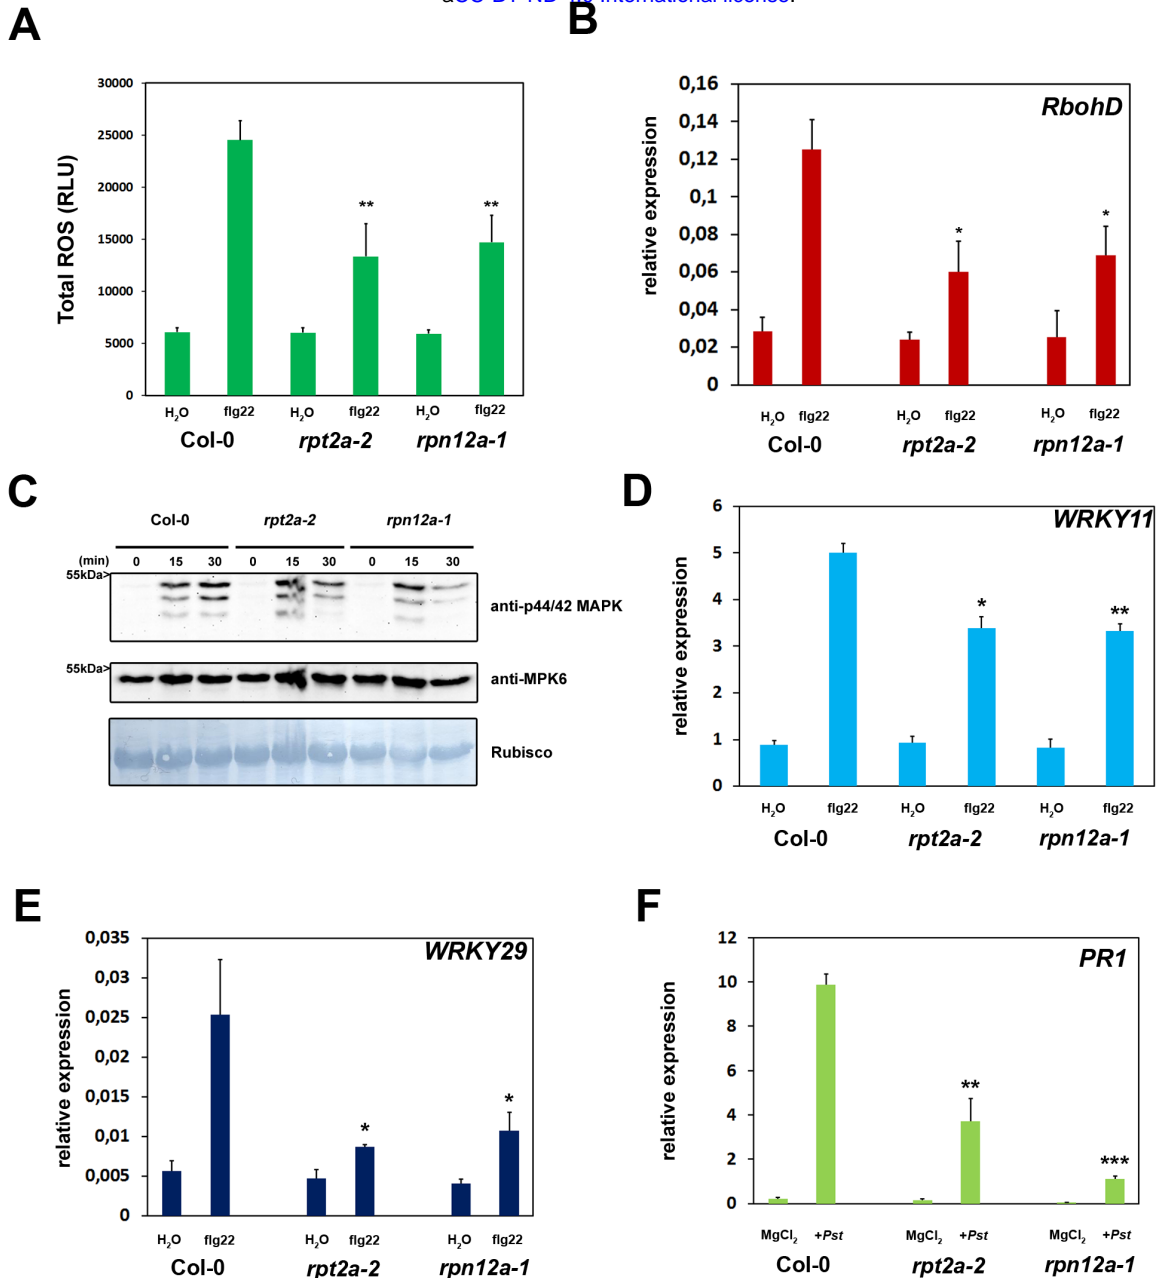

**Figure 4.** The proteasome is required for PAMP-Triggered Responses. **(A)** Total production of ROS in relative light units (RLU) during treatment with 1  $\mu$ M flg22 for 45 min. Each bar represents the mean of 4 biological replicates  $\pm$  SD. Statistical significance compared with Col-0 plants treated with flg22 is indicated by asterisks (Student's t test; \*\* $P < 0.01$ ). ROS production was evaluated in at least two independent experiments with similar results. **(B)** Quantitative RT-PCR of ROS (*RbohD*) after flg22 treatment is reduced in proteasome mutants. Plants were treated with 1  $\mu$ M flg22 or water (control). *UBC9* was used as a reference gene. Similar results were obtained in three independent experiments. Each bar represents the mean of 3 biological replicates  $\pm$  SD. Changes in fold expression are significant for all genes in comparison to the wild type (+flg22) according to student's t-test (\*\*,  $P < 0.01$ ; \*,  $P < 0.05$ ) **(C)** MAP Kinase signaling is comprised in proteasome mutant lines. Twelve-day-old seedlings were treated with 1  $\mu$ M flg22 and samples were collected 0 to 30 min after treatment as indicated. Activated MAPKs were detected by immunoblotting using anti-p44/42 MAPK antibody.

Proteins were also detected with anti-AtMIK1 antibody and amido black staining shows equal loading. Experiments were conducted twice with similar results. **(D, E)** PAMP-dependent induction of PTI marker genes is impaired in *Arabidopsis* proteasome mutant plants. Quantitative RT-PCR of immune response marker genes (*WRKY11* and *WRKY29*) 60 min after flg22 treatment. Plants were treated with 1  $\mu$ M flg22 or water (control). *UBC9* was used as a reference gene. Similar results were obtained in three independent experiments. Each bar represents the mean of 3 biological replicates  $\pm$  SD. Changes in fold expression are significant for all genes in comparison to the wild type (+flg22) according to student's t-test (\*\*,  $P < 0.01$ ; \*,  $P < 0.05$ ). **(F)** Relative *PR1* expression is decreased in proteasome mutant lines in response to *Pst* infection. Plants were infiltrated with *Pst* and gene expression was analyzed 24hpi. Each bar represents the mean of 3 biological replicates  $\pm$  SD. Changes in gene expression are significant for all genes in comparison to the wild type (+*Pst* infection) according to student's t-test (\*\*,  $P, 0.01$ ; \*\*\*,  $P, 0.001$ ).

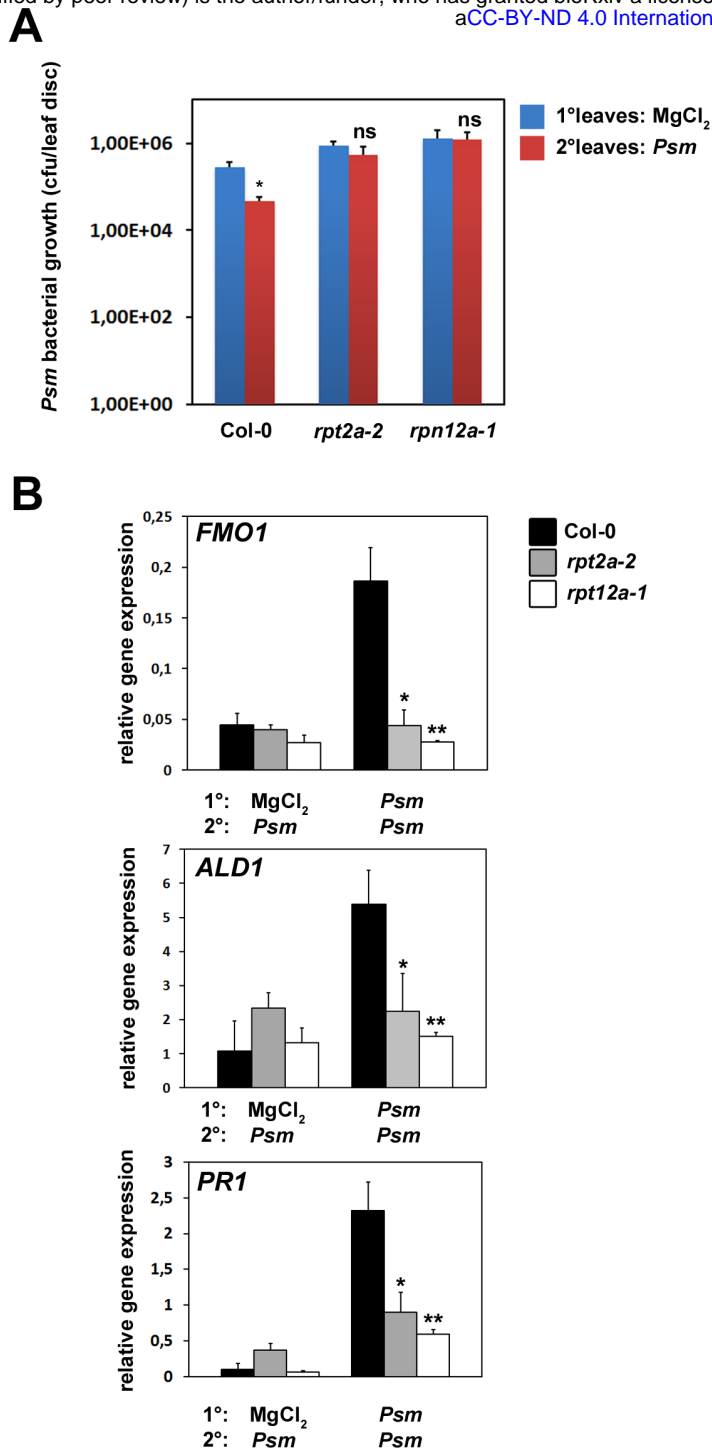

bioRxiv preprint doi: <https://doi.org/10.1101/053504>; this version posted May 15, 2016. The copyright holder for this preprint (which was not certified by peer review) is the author/funder, who has granted bioRxiv a license to display the preprint in perpetuity. It is made available under aCC-BY-ND 4.0 International license.

Significant differences in comparisons to Col-0 (*Psm/Psm* infected) were calculated using Student's t-test and are indicated by: \*, P,0.05; \*\*, P,0.01.



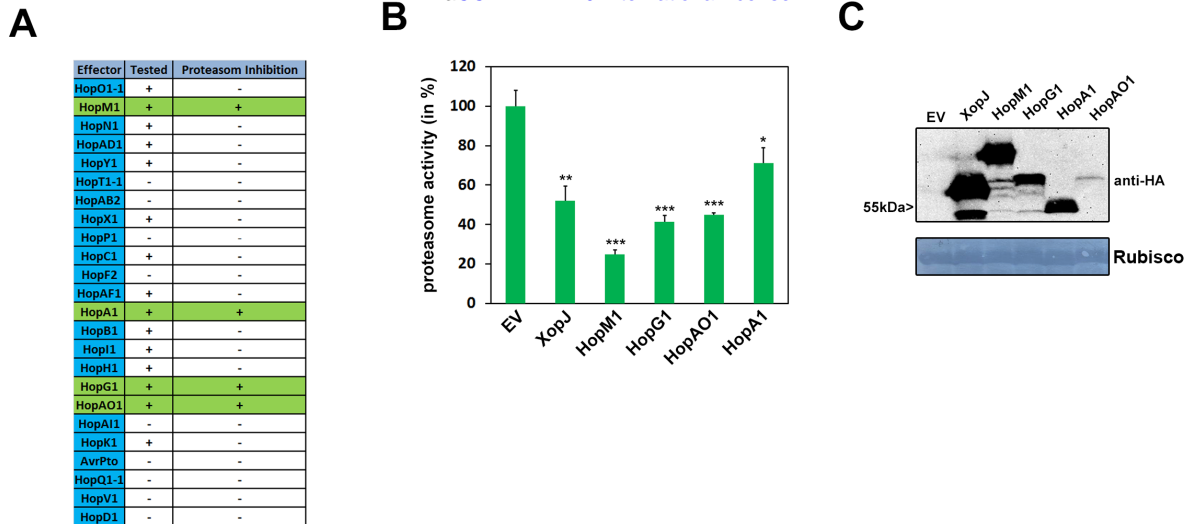

**Figure 6.** Type-III effectors from *Pst* DC3000 suppress proteasome activity in *N. benthamiana*. **(A)** Table of candidate effectors tested for their ability to modulate proteasome function. **(B)** Transient expression of T3Es HopM1, HopG1, HopAO1 and HopA1 in *Nicotiana benthamiana* inhibits proteasome activity. Proteasome activity in *N. benthamiana* leaves following transient expression of T3Es XopJ, HopM1, HopG1, HopA1, HopAO1 or empty vector control (EV). Relative proteasome activity in total protein extracts was determined by monitoring the breakdown of the fluorogenic peptide suc-LLVY-AMC at 30°C in a fluorescence spectrophotometer. EV was set to 100%. Data represent the mean  $\pm$  standard deviation (SD) ( $n = 3$ ). Asterisks indicate statistical significance (\* $P < 0.05$ , \*\* $P < 0.01$ , \*\*\* $P < 0.001$ ) determined by Student's *t* test (compared with EV control). **(C)** Protein extracts from *N. benthamiana* leaves transiently expressing T3Es tagged with HA and empty vector (EV) at 48 hpi were prepared. Equal volumes representing approximately equal protein amounts of each extract were immunoblotted and proteins were detected using anti-HA antiserum. Amido black staining served as a loading control.

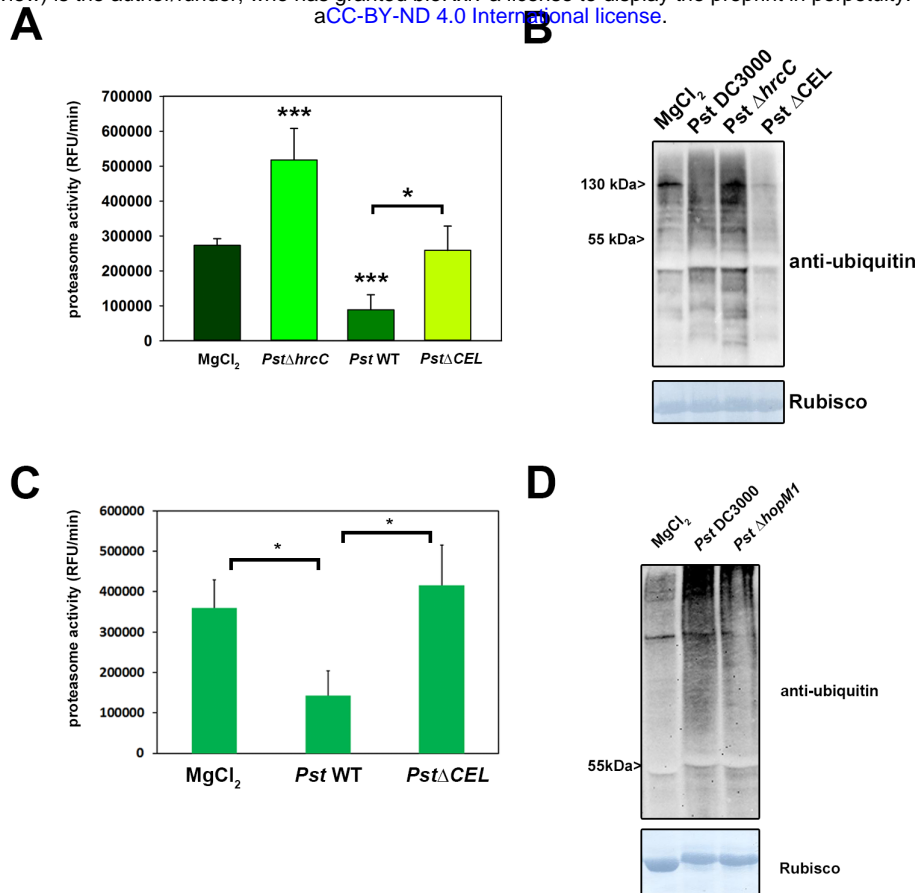

**Figure 7.** *Pseudomonas* T3E HopM1 is required for proteasome inhibition during *Pst* DC3000-*Arabidopsis* interaction. **(A)** Proteasome activity in leaves of *Arabidopsis* plants infected with either *Pst* wild type bacteria, *Pst* Δ*hrcC* and *Pst* Δ*CEL* strain lacking the conserved effector locus harboring HopM1. Samples were taken 2 dpi and the relative proteasome activity was determined. Each bar represents the mean of 3 biological replicates ± SD. MgCl<sub>2</sub> infiltration serves as a mock control. Asterisks indicate a statistical difference according to student's *t*-test (\* *P* < 0.05; \*\*\*, *P* < 0.001). The experiment was repeated three times with similar results. **(B)** Accumulation of ubiquitinated proteins in *Arabidopsis* leaves after infection with different *Pst* strains indicated in the figure was determined using an anti-ubiquitin antibody. **(C)** Proteasome activity in leaves of *Arabidopsis* plants infected with either *Pst* wild type bacteria, *Pst* Δ*hrcC* and *Pst* Δ*hopM1*. Samples were taken 2 dpi and the relative proteasome activity was determined. Each bar represents the mean of 3 biological replicates ± SD. MgCl<sub>2</sub> infiltration serves as a mock control. Asterisks indicate a statistical difference according to student's *t*-test (\* *P* < 0.05). The experiment was repeated two times with similar results. **(D)** Accumulation of ubiquitinated proteins in *Arabidopsis* leaves after infection with different *Pst* strains indicated in the figure was determined using an anti-ubiquitin antibody.

| Table 1: List of UPS related proteins co-immunoprecipitated with HopM1 |                             |                  |                                 |       | Total Unique Peptide Count |       |       |                        | At homologue |
|------------------------------------------------------------------------|-----------------------------|------------------|---------------------------------|-------|----------------------------|-------|-------|------------------------|--------------|
|                                                                        |                             |                  |                                 |       | GFP Control                |       | HopM1 |                        |              |
| Name of the Protein                                                    | Accession Number            | Molecular Weight | Fisher's Exact Test (p <= 0.05) | Rep 1 | Rep 2                      | Rep 1 | Rep 2 |                        |              |
| <b>26S Proteasome related proteins</b>                                 |                             |                  |                                 |       |                            |       |       |                        |              |
| Cluster of Proteasome associated protein ECM29                         | NbS00044170g0008.1_SGN      | 198 kDa          | < 0.00010                       | 1     | 0                          | 18    | 22    | AT2G26780              |              |
| Cluster of 26S proteasome regulatory subunit                           | NbS00007460g0008.1_SGN [2]  | 142 kDa          | 0.023                           | 8     | 1                          | 14    | 14    | AT2G32730              |              |
| Cluster of Probable 26S proteasome non-ATPase regulatory subunit 3     | NICBE_198688.1_TGAC [3]     | 55 kDa           | < 0.00010                       | 4     | 0                          | 15    | 22    | AT1G75990              |              |
| Cluster of 26S protease regulatory subunit 6B homolog                  | NICBE_268659.1_TGAC [4]     | 64 kDa           | 0.08                            | 6     | 0                          | 8     | 7     | AT5G58290              |              |
| Cluster of 26S proteasome non-ATPase regulatory subunit 2 1A           | NICBE_166405.1_TGAC [2]     | 98 kDa           | < 0.00010                       | 6     | 0                          | 19    | 21    | AT2G20580              |              |
| 26S protease regulatory subunit 7 homolog A                            | NICBE_154102.1_TGAC (+2)    | 48 kDa           | 0.0013                          | 2     | 0                          | 13    | 11    | AT1G53750              |              |
| Cluster of 26S protease regulatory subunit 6A homolog                  | NICBE_248120.1_TGAC [4]     | 53 kDa           | 0.018                           | 2     | 0                          | 12    | 3     | AT3G05530              |              |
| Cluster of 26S proteasome non-ATPase regulatory subunit 11             | NbS00016436g0001.1_SGN [4]  | 47 kDa           | 0.08                            | 3     | 0                          | 9     | 4     | AT1G29150              |              |
| Cluster of 26S proteasome non-ATPase regulatory subunit 2 1A           | NICBE_172900.1_TGAC [2]     | 98 kDa           | 0.0011                          | 6     | 0                          | 15    | 18    | AT2G20580              |              |
| Cluster of 26S proteasome non-ATPase regulatory subunit 12             | NICBE_244180.1_TGAC [2]     | 51 kDa           | 0.0069                          | 1     | 0                          | 10    | 7     | AT5G09900              |              |
| Probable 26S proteasome non-ATPase regulatory subunit 6                | NICBE_167161.1_TGAC (+1)    | 44 kDa           | 0.033                           | 2     | 0                          | 7     | 8     | AT4G24820              |              |
| 26S protease regulatory subunit 8 homolog A                            | NICBE_417606.1_TGAC (+1)    | 47 kDa           | 0.077                           | 2     | 1                          | 8     | 7     | AT5G19990              |              |
| Cluster of 26S protease regulatory subunit S10B homolog B              | NICBE_194312.1_TGAC         | 44 kDa           | 0.13                            | 3     | 0                          | 7     | 6     | AT1G45000              |              |
| 26S proteasome non-ATPase regulatory subunit 14                        | NICBE_364948.1_TGAC (+1)    | 45 kDa           | 0.039                           | 0     | 0                          | 6     | 2     | AT5G23540              |              |
| 26S proteasome non-ATPase regulatory subunit 7                         | NbS00041405g0012.1_SGN (+1) | 35 kDa           | 0.48                            | 3     | 0                          | 2     | 6     | AT5G05780              |              |
| <b>Ubiquitin related proteins</b>                                      |                             |                  |                                 |       |                            |       |       |                        |              |
| Cluster of Ubiquitin protein ligase 1                                  | NbS00002172g0012.1_SGN [6]  | 319 kDa          | < 0.00010                       | 2     | 0                          | 59    | 23    | AT1G55860              |              |
| Cluster of Auxin transport protein BIG                                 | NbS00009154g0017.1_SGN [2]  | 537 kDa          | < 0.00010                       | 4     | 0                          | 41    | 16    | AT3G02260              |              |
| Cluster of E3 ubiquitin protein ligase UPL3                            | NbS00031527g0002.1_SGN [3]  | 199 kDa          | 0.0048                          | 1     | 0                          | 16    | 1     | AT4G38600              |              |
| Cluster of E3 ubiquitin-protein ligase UPL1                            | NICBE_298798.1_TGAC [2]     | 389 kDa          | 0.0016                          | 0     | 0                          | 7     | 9     | AT1G55860              |              |
| Ubiquitin conjugation factor E4                                        | NbS00018754g0010.1_SGN      | 91 kDa           | 0.26                            | 3     | 0                          | 8     | 3     | AT5G15400              |              |
| Cluster of Ubiquitin-conjugating enzyme E2 36                          | NICBE_251503.1_TGAC [2]     | 17 kDa           | 0.11                            | 1     | 0                          | 8     | 0     | AT1G16890              |              |
| Cluster of E3 ubiquitin protein ligase listerin                        | NbS00000796g0017.1_SGN      | 135 kDa          | 0.039                           | 0     | 0                          | 2     | 6     | AT5G58410              |              |
| Probable ubiquitin conjugation factor E4                               | NICBE_244276.1_TGAC         | 83 kDa           | 0.56                            | 3     | 0                          | 5     | 2     | AT5G15400              |              |
| <b>Known HopM1 Interactors</b>                                         |                             |                  |                                 |       |                            |       |       |                        |              |
| Cluster of ARF guanine nucleotide exchange factor 2                    | NbS00006288g0001.1_SGN [3]  | 207 kDa          | < 0.00010                       | 5     | 0                          | 28    | 29    | AT3G43300 (MIN7 like)  |              |
| Cluster of Sec7 guanine nucleotide exchange factor                     | NbS00008405g0008.1_SGN [2]  | 171 kDa          | < 0.00010                       | 5     | 0                          | 35    | 46    | AT3G43300 (MIN7 like)  |              |
| Sec7 guanine nucleotide exchange factor                                | NbS00016714g0003.1_SGN      | 197 kDa          | 0.0052                          | 0     | 0                          | 9     | 4     | AT3G43300 (MIN7 like)  |              |
| Cluster of 14-3-3-like protein 16R                                     | NICBE_421663.1_TGAC [4]     | 29 kDa           | 0.14                            | 7     | 0                          | 17    | 7     | AT4G24150 (MIN10 like) |              |

**TABLE 1:** List of UPS related proteins co-immunoprecipitated with HopM1. The significant values (Fisher Exact test p<=0.05) are indicated by Green color.

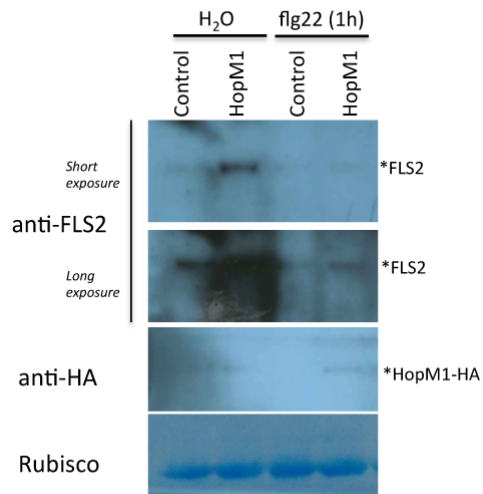

**Figure 8.** HopM1 leads to the accumulation of FLS2 protein. Western blot showing the protein levels in *Arabidopsis* Col-0 protoplasts transformed with either control or HopM1-HA using FLS2-specific antibody. The protoplasts were harvested after treating with water as control or 100 nM flg22 for 1 h.
